# Supplementary material for: Large Scale Metabolic Profiling identifies Novel Steroids linked to Rheumatoid Arthritis
Source: PubMed Central journal article supplement (PMC5567269; doi:10.1038/s41598-017-05439-1), 2017-08-22

## Large Scale Metabolic Profiling identifies Novel Steroids linked to Rheumatoid Arthritis

Noha A. Yousri<sup>1,2</sup>, Karim Bayoumy<sup>3,4</sup>, Wessam Gad Elhaq<sup>3,14</sup>, Robert P. Mohny<sup>5</sup>, Samar Al Emadi<sup>6,15</sup>, Mohammed Hammoudeh<sup>6,15</sup>, Hussein Halabi<sup>7,15</sup>, Basel Masri<sup>8,15</sup>, Humeira Badsha<sup>9,15</sup>, Imad Uthman<sup>10,15</sup>, Robert Plenge<sup>11,15</sup>, Richa Saxena<sup>12,13,15</sup>, Karsten Suhre<sup>1</sup>, Thurayya Arayssi<sup>14,15</sup>

<sup>1</sup>Bioinformatics Core, Physiology and Biophysics, Weill Cornell Medicine- Qatar, Doha. <sup>2</sup>Computers and Systems Engineering, Faculty of Engineering, Alexandria University, Egypt. <sup>3</sup>Research Division, Weill Cornell Medical College-Qatar, Education City, Doha, Qatar. <sup>4</sup>Department of Internal Medicine, Hamad Medical Corporation, Doha, Qatar. <sup>5</sup>Metabolon Inc., Durham, NC, USA. <sup>6</sup>Division of Rheumatology, Department of Medicine, Hamad Medical Corporation, Doha, Qatar. <sup>7</sup>King Faisal Specialist Hospital & Research center, Jeddah, Kingdom of Saudi Arabia. <sup>8</sup>Jordan Hospital, Amman, Jordan. <sup>9</sup>Dr. Humeira Badsha Medical Center, Dubai, UAE. <sup>10</sup>American University of Beirut, Faculty of Medicine, Beirut, Lebanon. <sup>11</sup>Merck, Boston, MA, USA, Division of Rheumatology, Immunology, and Allergy, Brigham and Women's Hospital, Harvard Medical School, Boston, MA, USA. <sup>12</sup>Center for Human Genetic Research, Department of Anesthesia, Critical Care and Pain Medicine, Massachusetts General Hospital, Harvard Medical School, Boston, MA, USA. <sup>13</sup>Program in Medical and Population Genetics, Broad Institute, Cambridge, MA, USA. <sup>14</sup>Department of Medicine, Weill Cornell Medical College-Qatar, Education City, Doha, Qatar. <sup>15</sup>Member of the Middle East Rheumatoid Arthritis Consortium (MERAC)

### Supplemental Information:

**Supplemental Figure 1:** GGM subnetworks where nodes correspond to metabolites and edges are significant partial correlations. Size of the node is proportional to its significance of association with RA. The color of the node indicates the superpathway of the metabolite according to the legend.

**Supplemental Figure 2:** Boxplots of 32 metabolites associated with RA for each of the RA groups with different corticosteroid treatment.

**Supplemental Methods:** Interaction Model.

**Supplemental Table 1:** Results of regression of all metabolites against case/control while including covariates and using interaction model.

**Supplemental Table 2:** Output from OPLS-DA analysis using 96 metabolites and covariates.

**Supplemental Table 3:** SIMCA OPLS-DA output using all features (metabolites and covariates).

**Supplemental Table 4:** Results of regression of 32 RA metabolites in RA samples only using covariates according to feature selection.

**Supplemental Table 5:** Correlation of batch (KSA batch and Qatar batch) with different phenotypes.

**Supplemental Figure 1:** GGM subnetworks where nodes correspond to metabolites and edges are significant partial correlations. Size of the node is proportional to its significance of association with RA. The color of the node indicates the superpathway of the metabolite according to the legend.

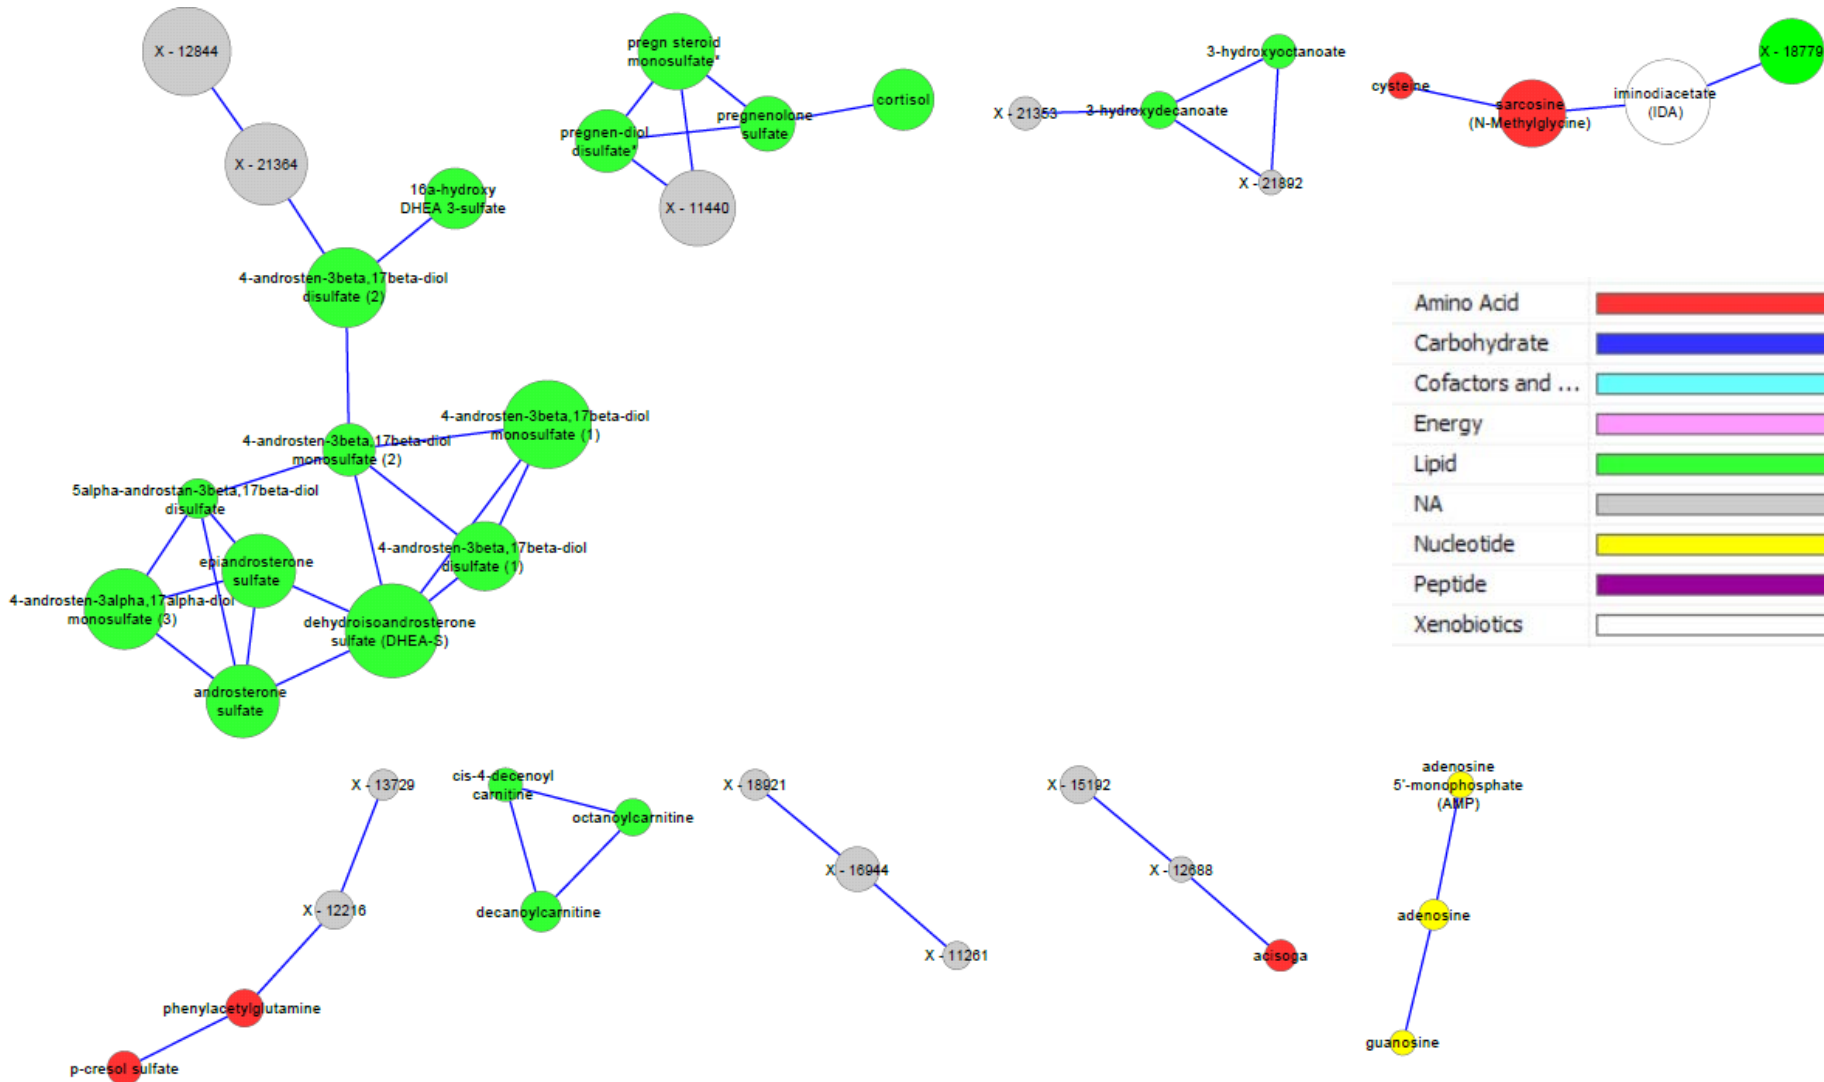

|                   |                                                                                               |
|-------------------|-----------------------------------------------------------------------------------------------|
| Amino Acid        | <span style="display:inline-block; width:20px; height:10px; background-color:red;"></span>    |
| Carbohydrate      | <span style="display:inline-block; width:20px; height:10px; background-color:blue;"></span>   |
| Cofactors and ... | <span style="display:inline-block; width:20px; height:10px; background-color:cyan;"></span>   |
| Energy            | <span style="display:inline-block; width:20px; height:10px; background-color:pink;"></span>   |
| Lipid             | <span style="display:inline-block; width:20px; height:10px; background-color:green;"></span>  |
| NA                | <span style="display:inline-block; width:20px; height:10px; background-color:grey;"></span>   |
| Nucleotide        | <span style="display:inline-block; width:20px; height:10px; background-color:yellow;"></span> |
| Peptide           | <span style="display:inline-block; width:20px; height:10px; background-color:purple;"></span> |
| Xenobiotics       | <span style="display:inline-block; width:20px; height:10px; background-color:white;"></span>  |

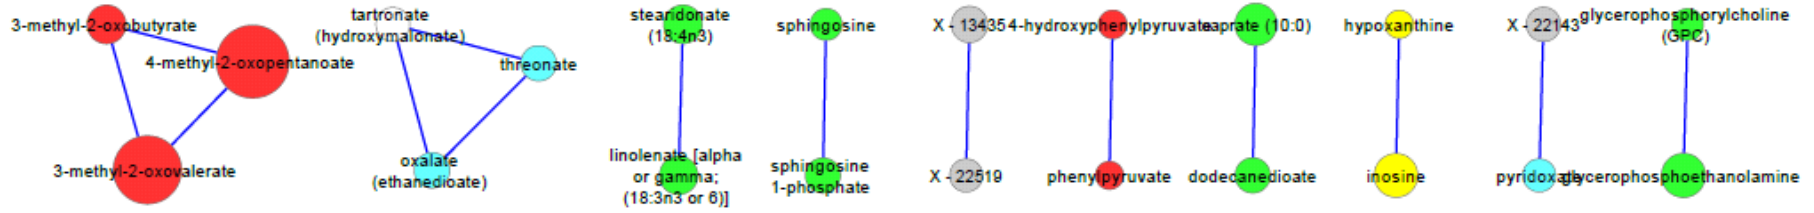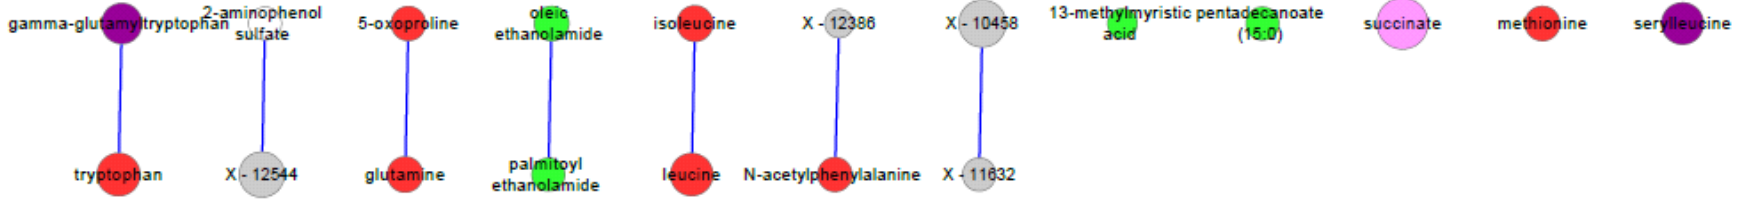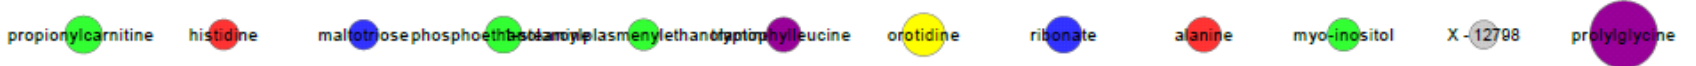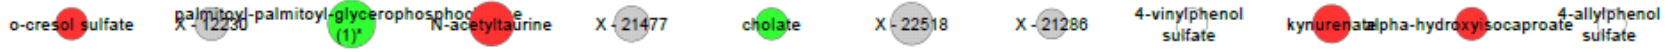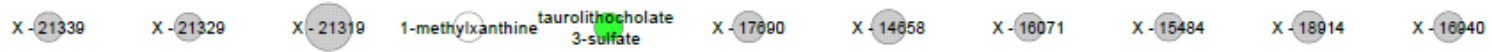

**Supplemental Figure 2:** Boxplots of 32 metabolites associated with RA for each of the RA groups with different corticosteroid treatment.

# dehydroisoandrosterone sulfate (DHEA-S)

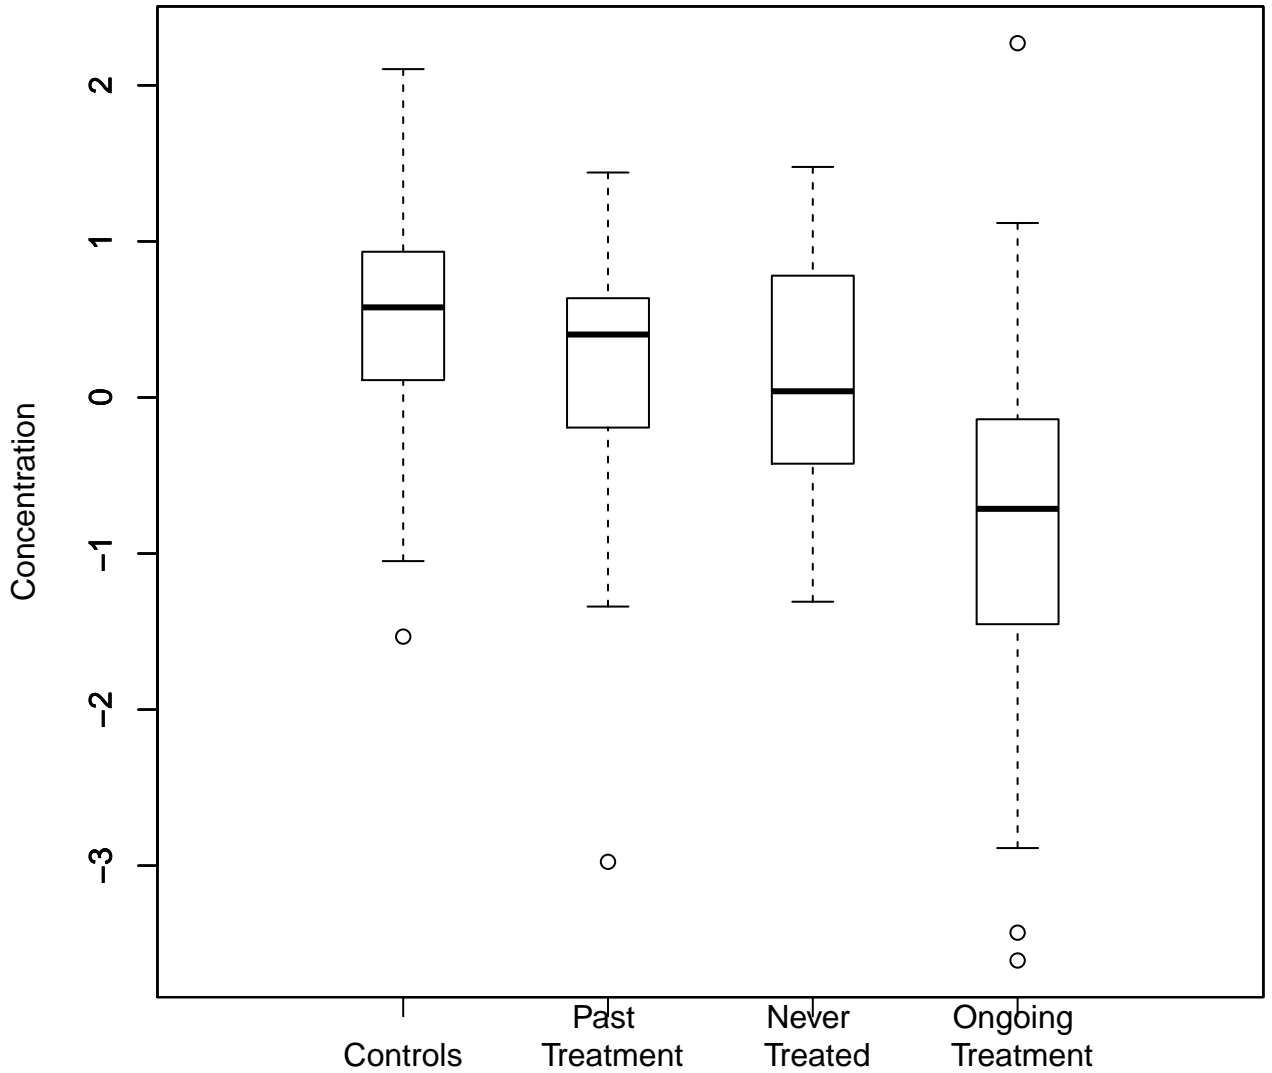

# X - 11444

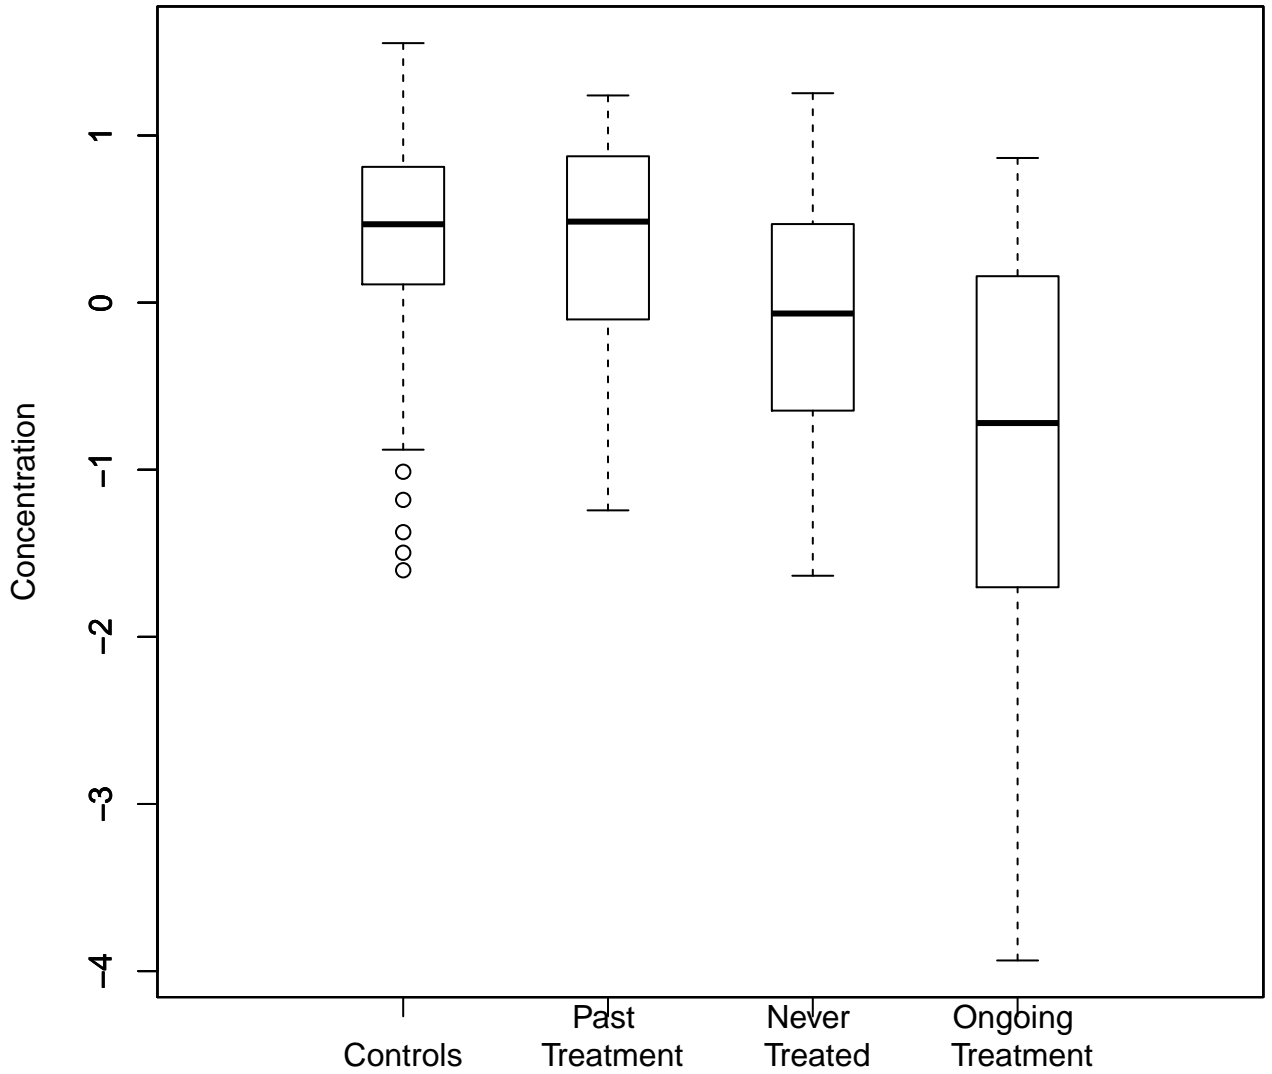

# X - 12844

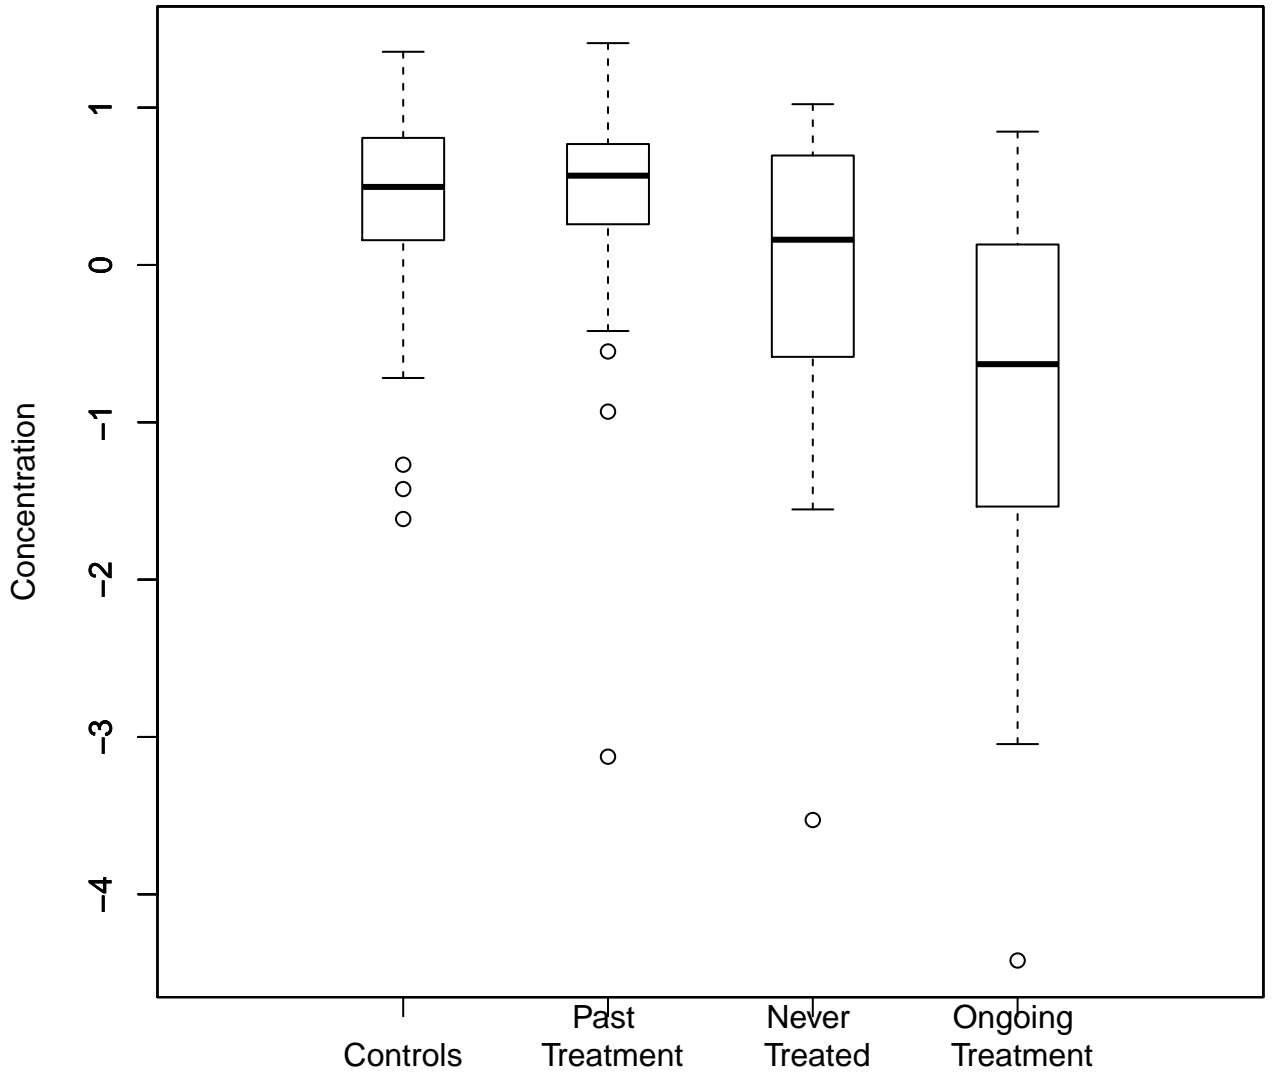



# 4-androsten-3beta,17beta-diol monosulfate (1)

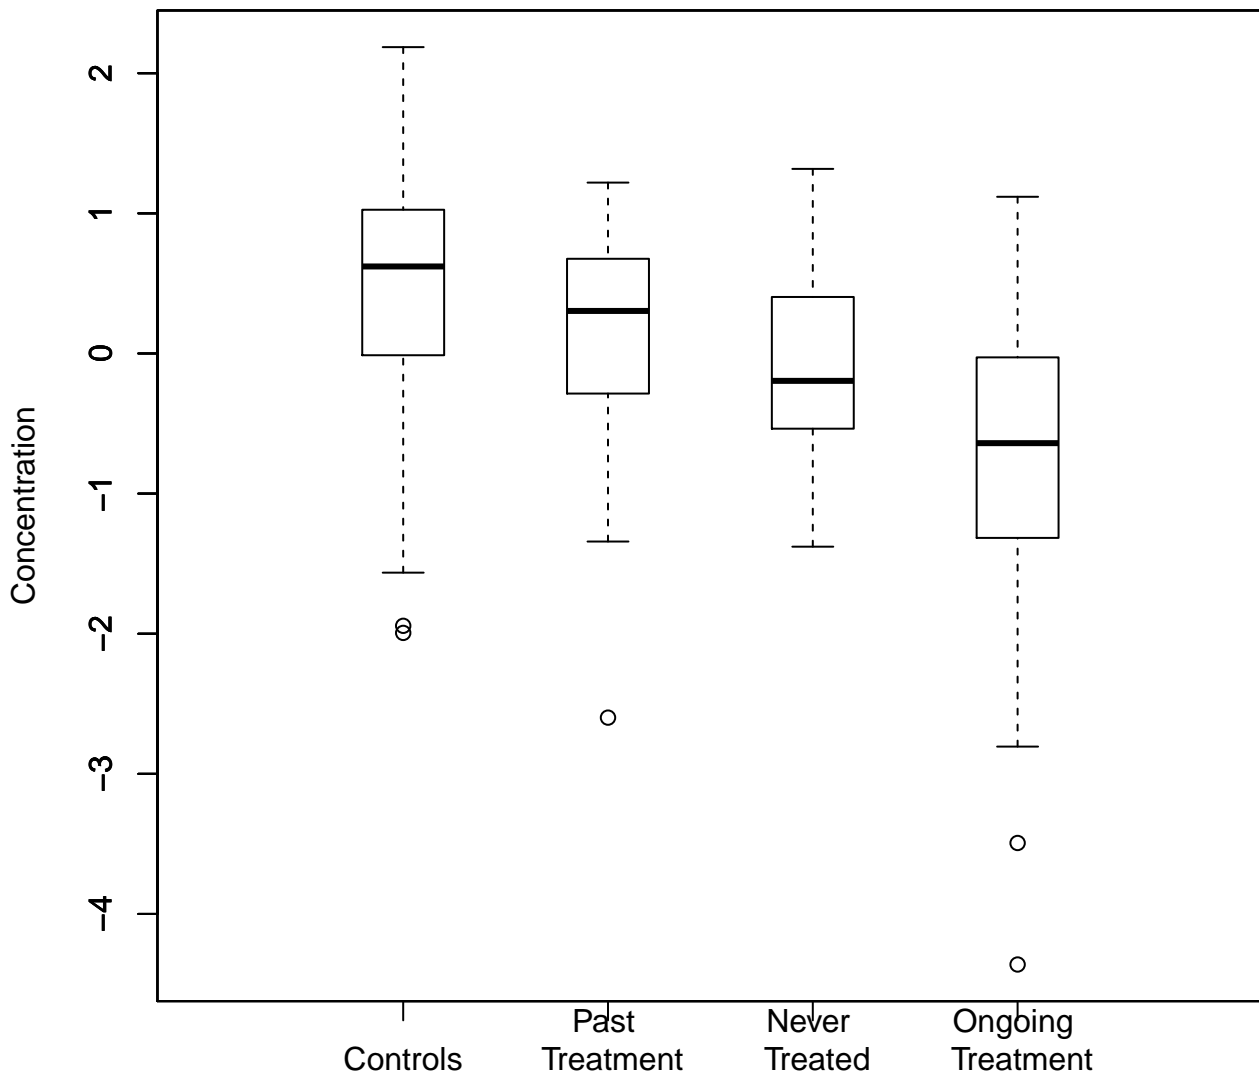

# iminodiacetate (IDA)

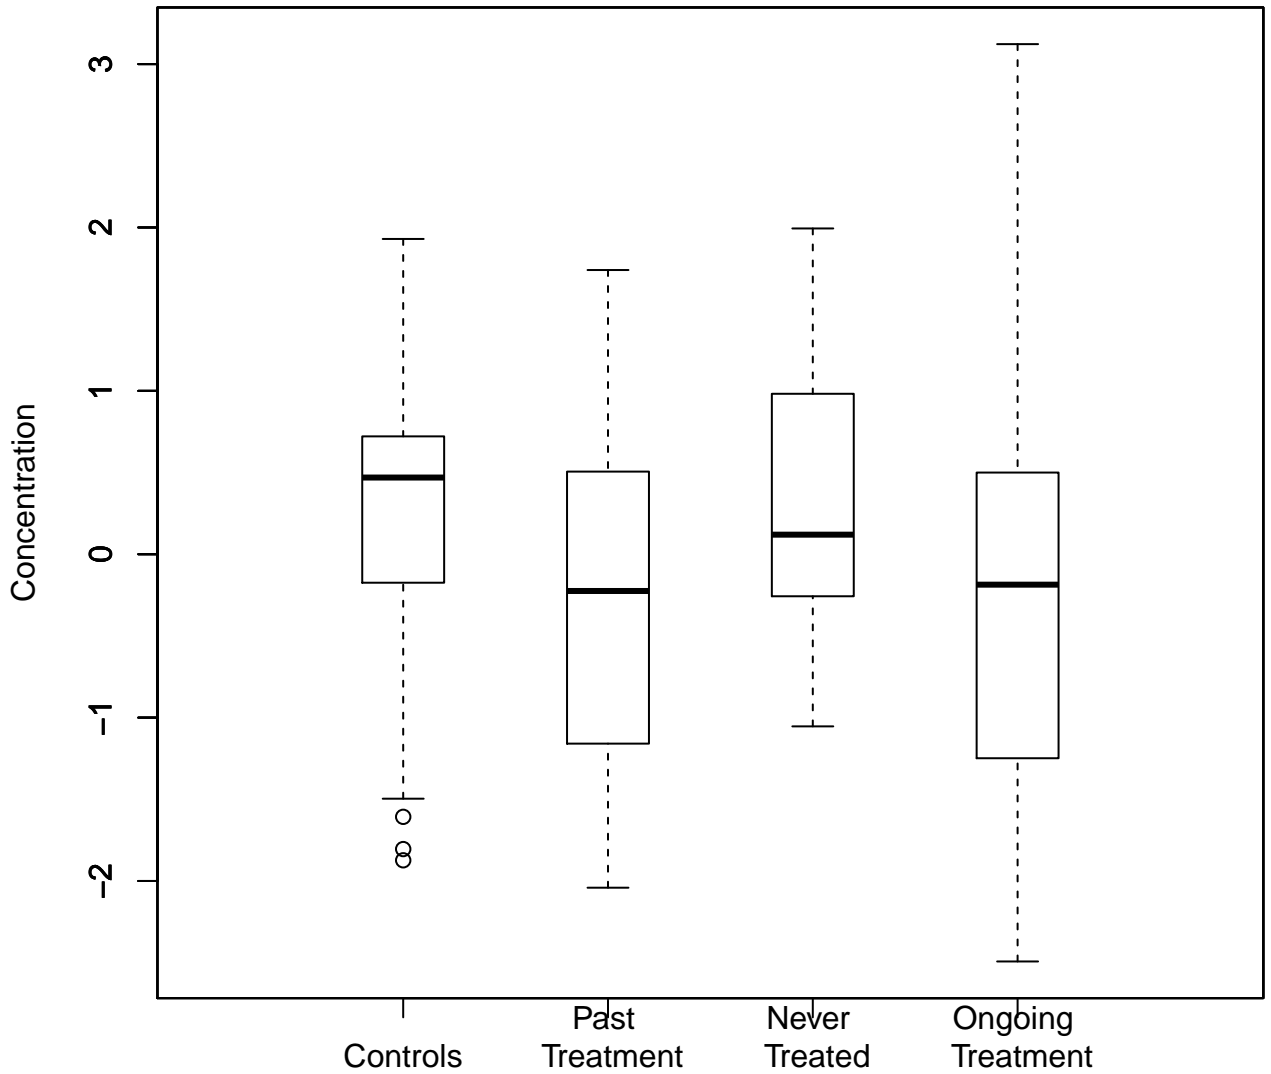

# X - 21364

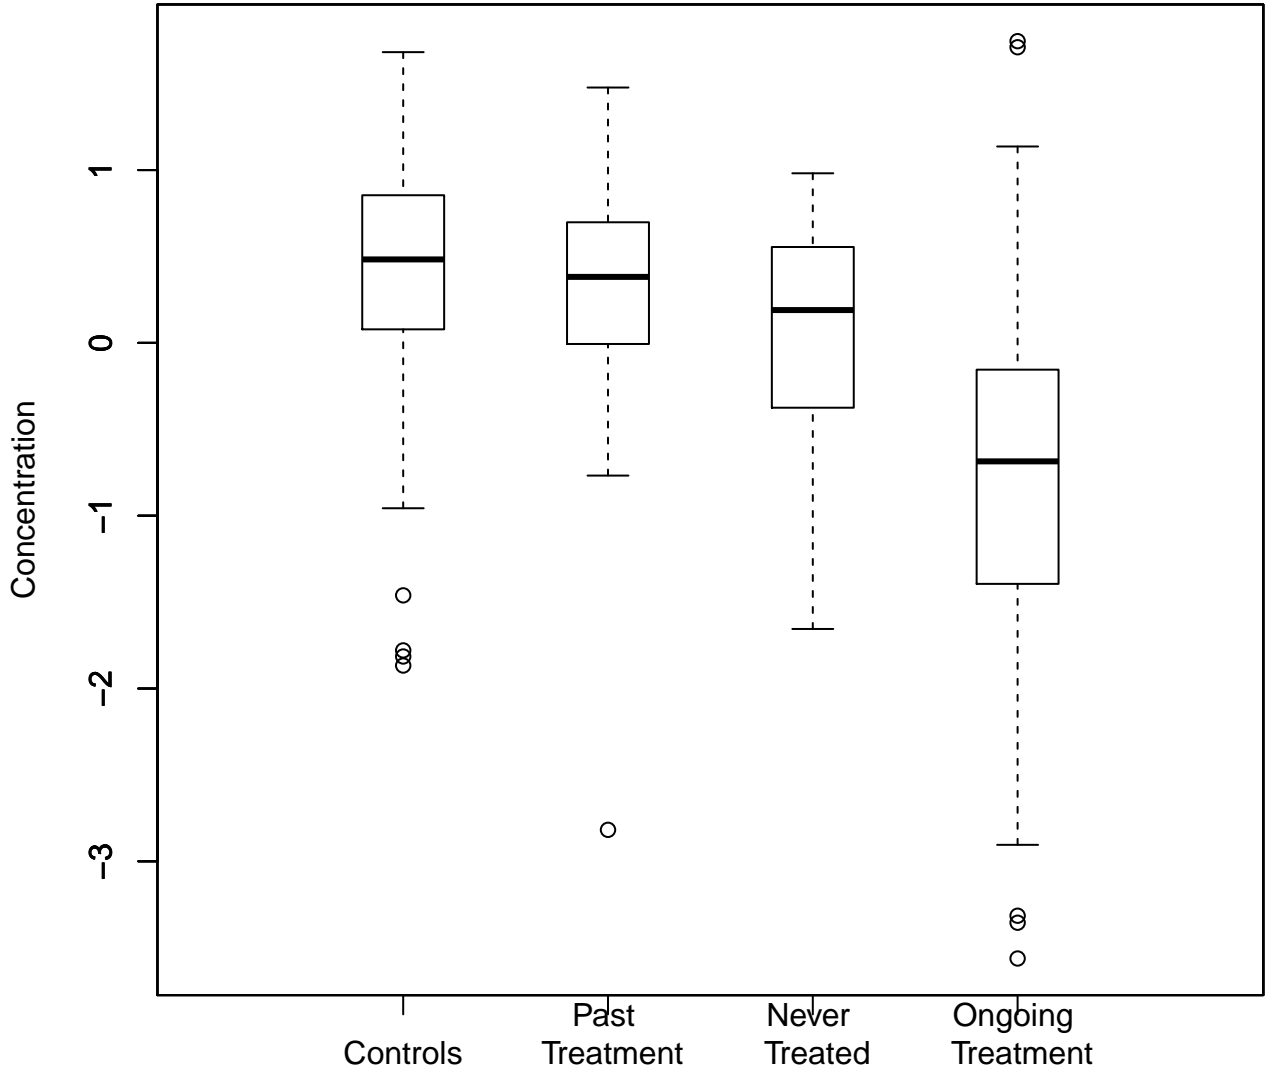

# 4-androsten-3alpha,17alpha-diol monosulfate (3)

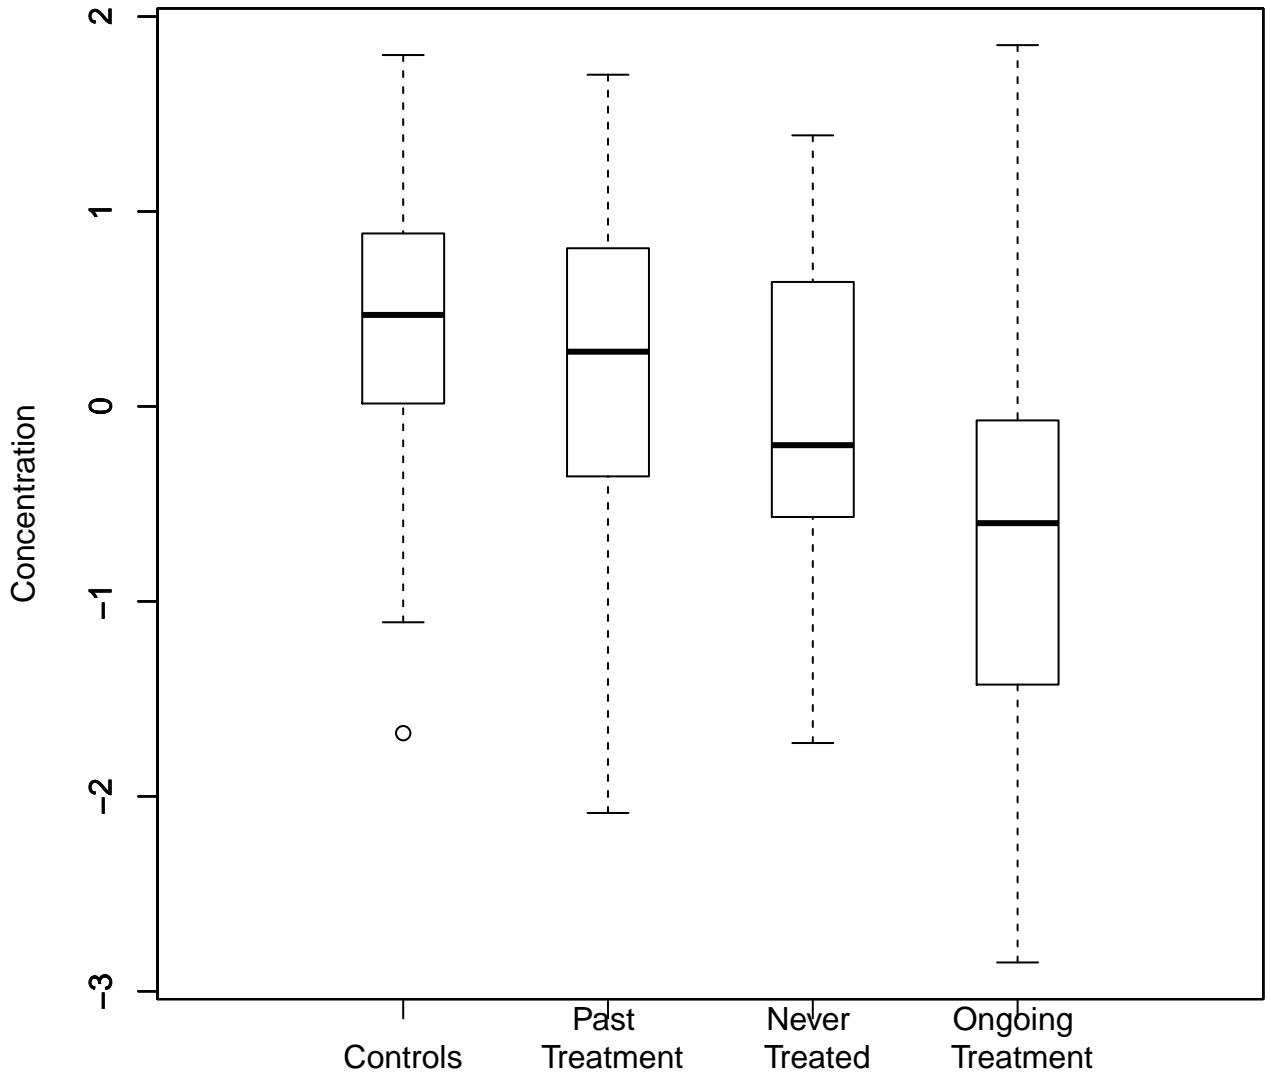

# 4-androsten-3beta,17beta-diol disulfate (2)

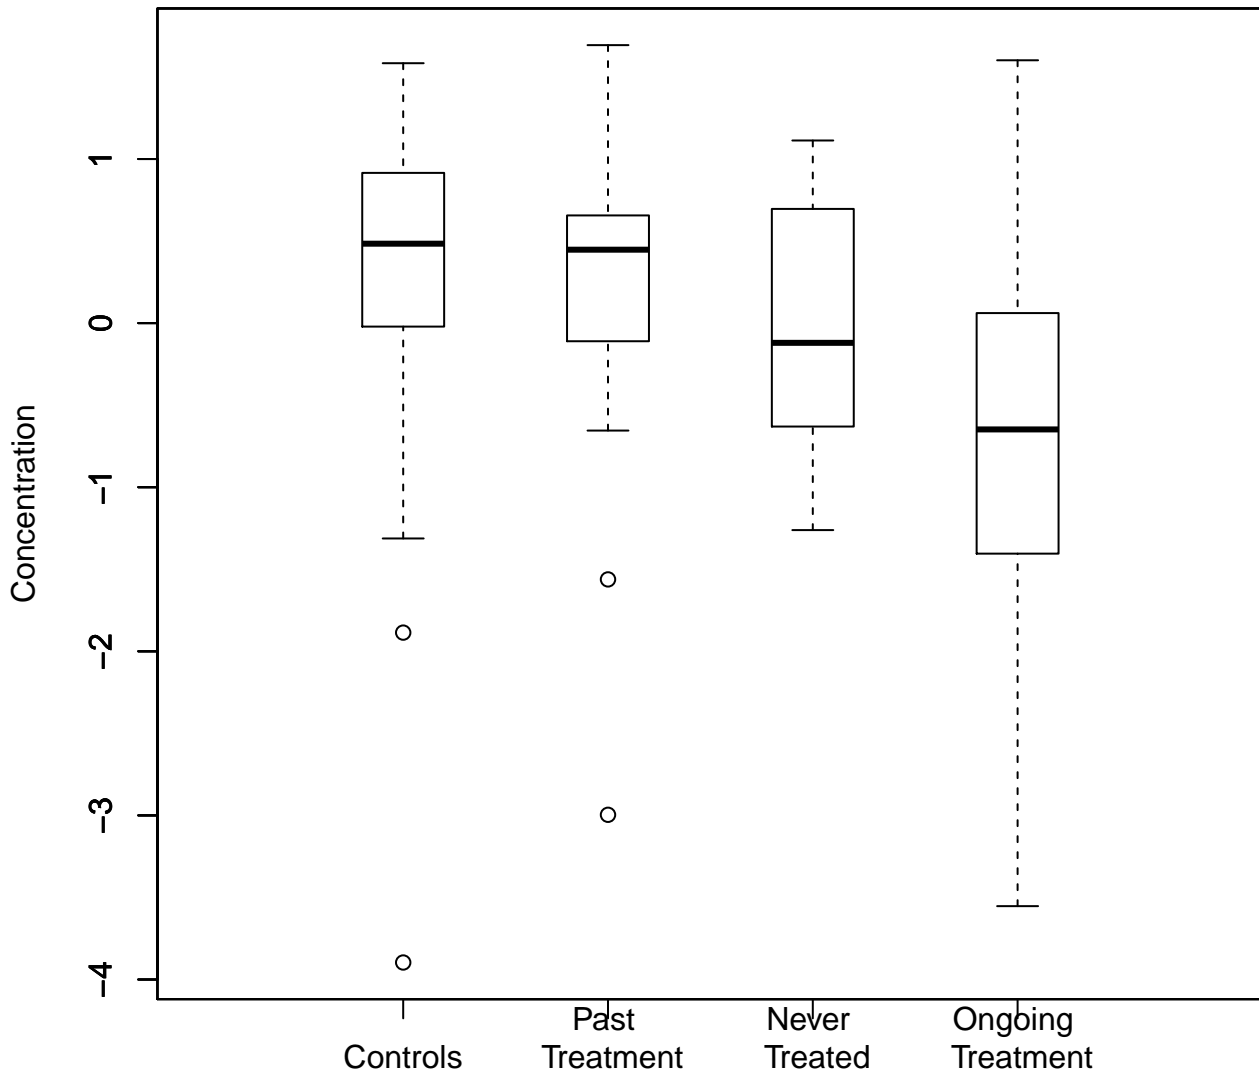

# pregn steroid monosulfate\*

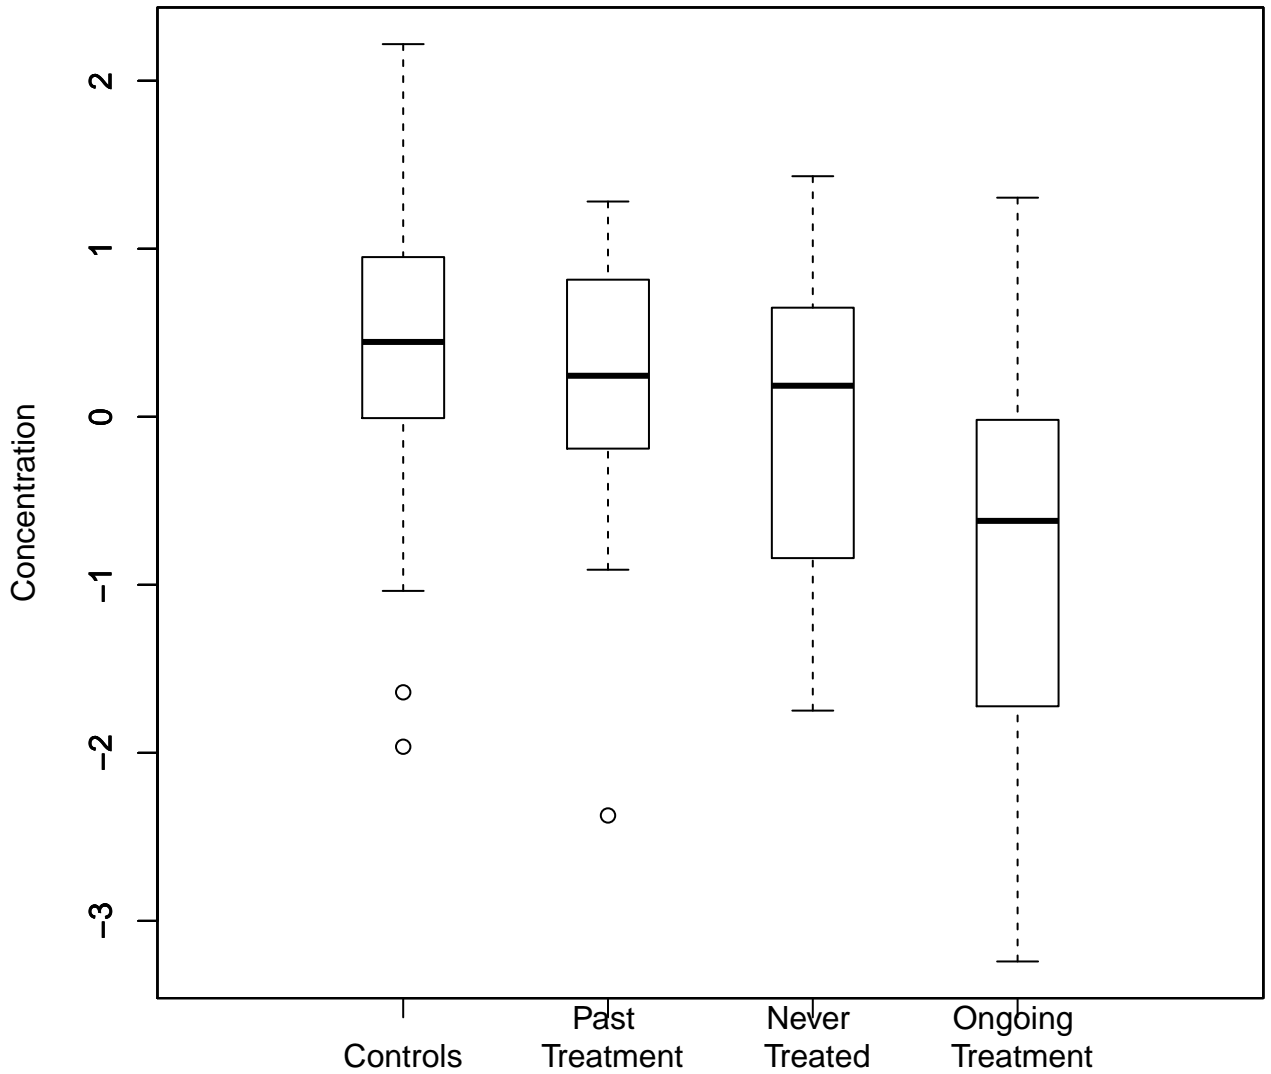

# X - 12846

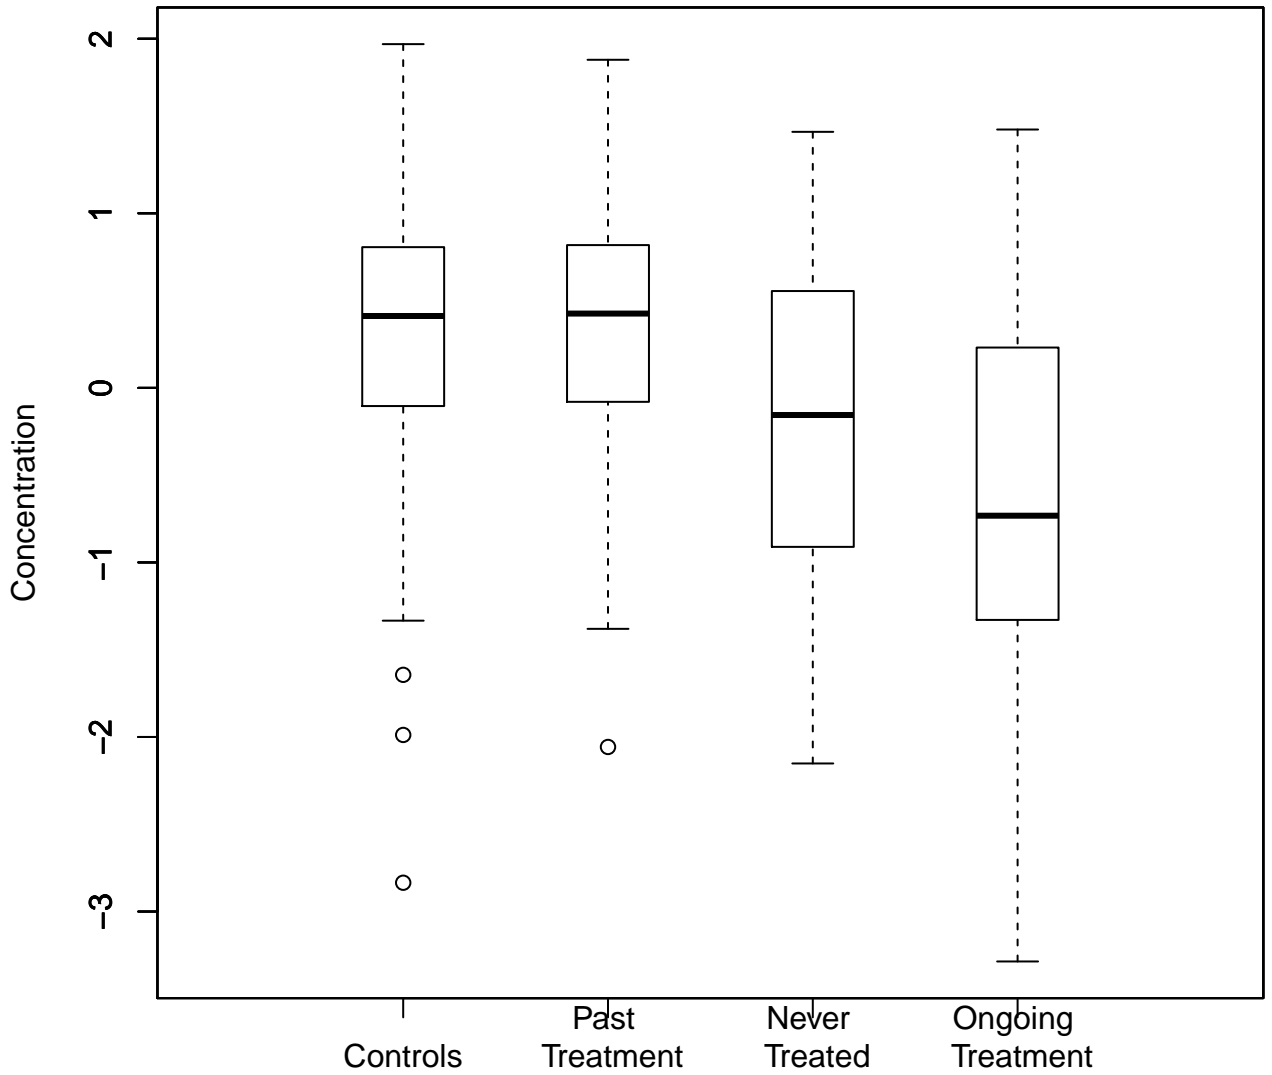

# X - 11440

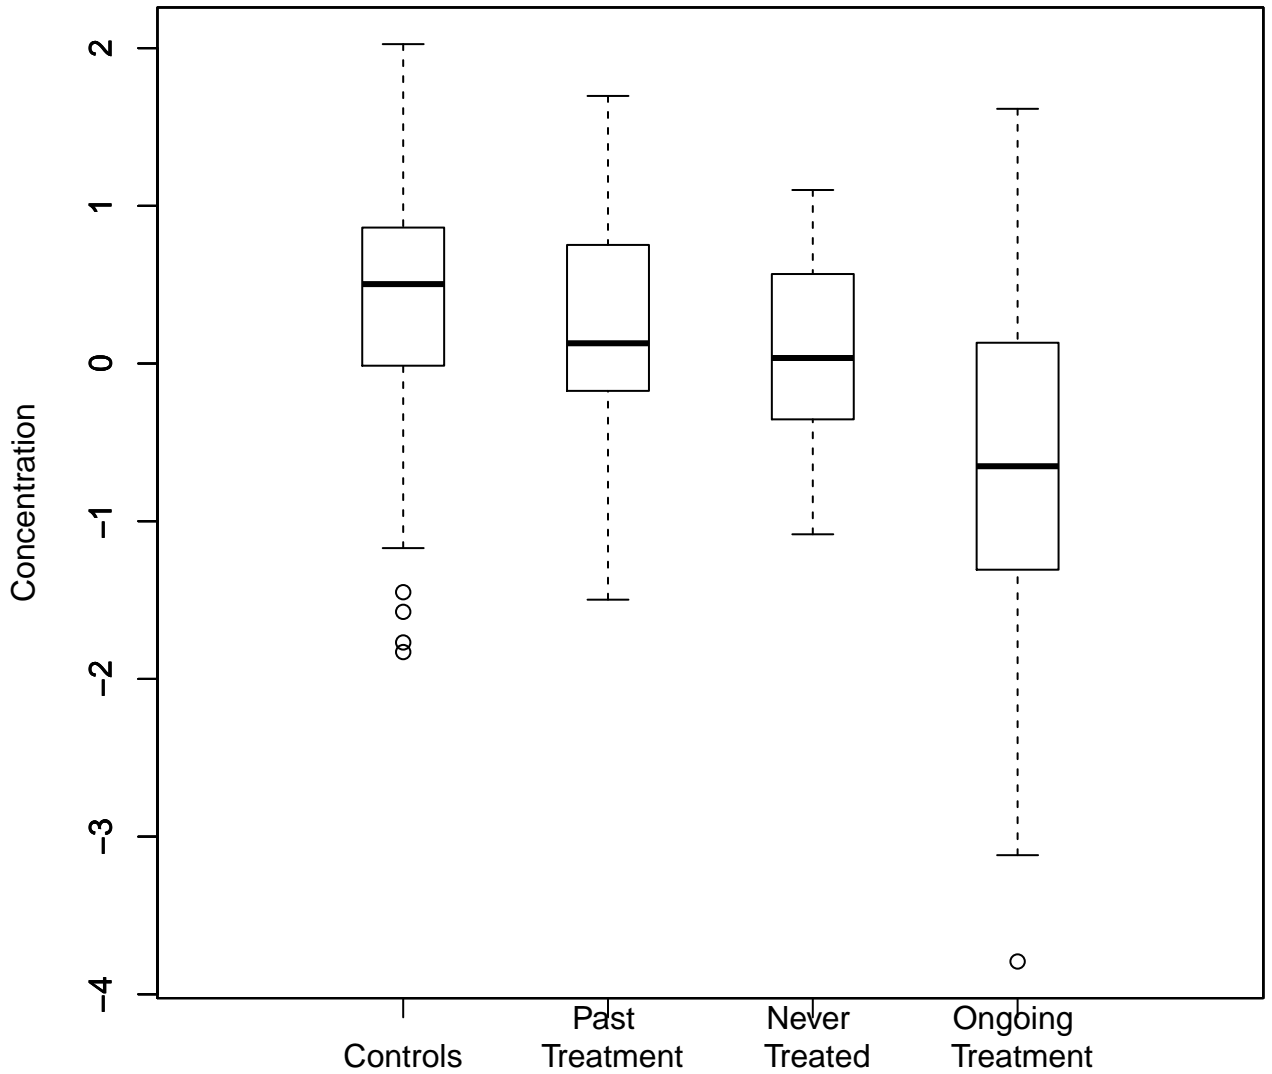



# epiandrosterone sulfate

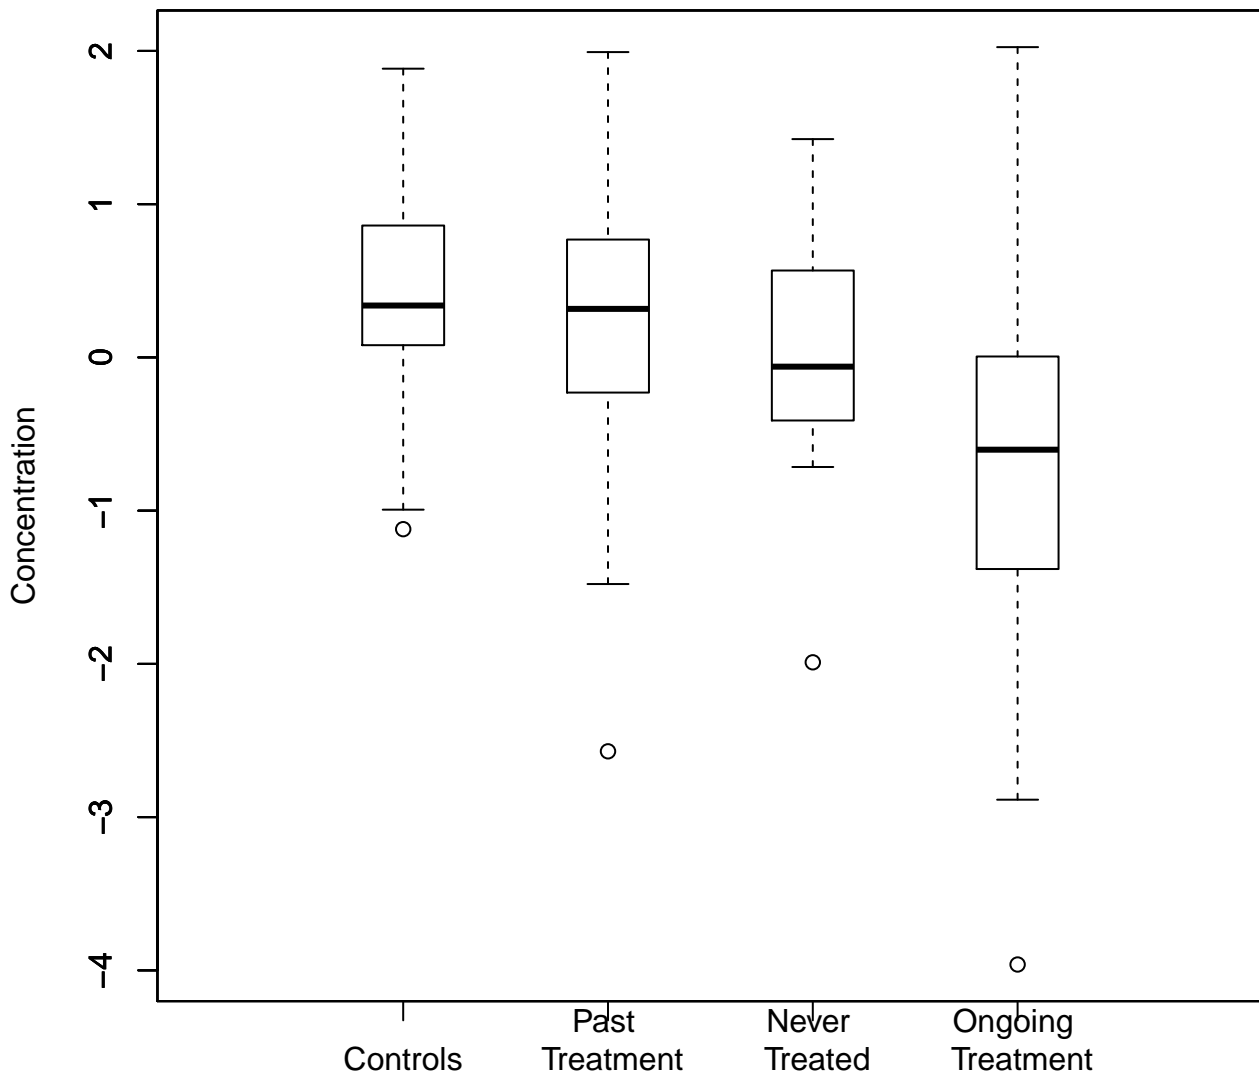

# androsterone sulfate

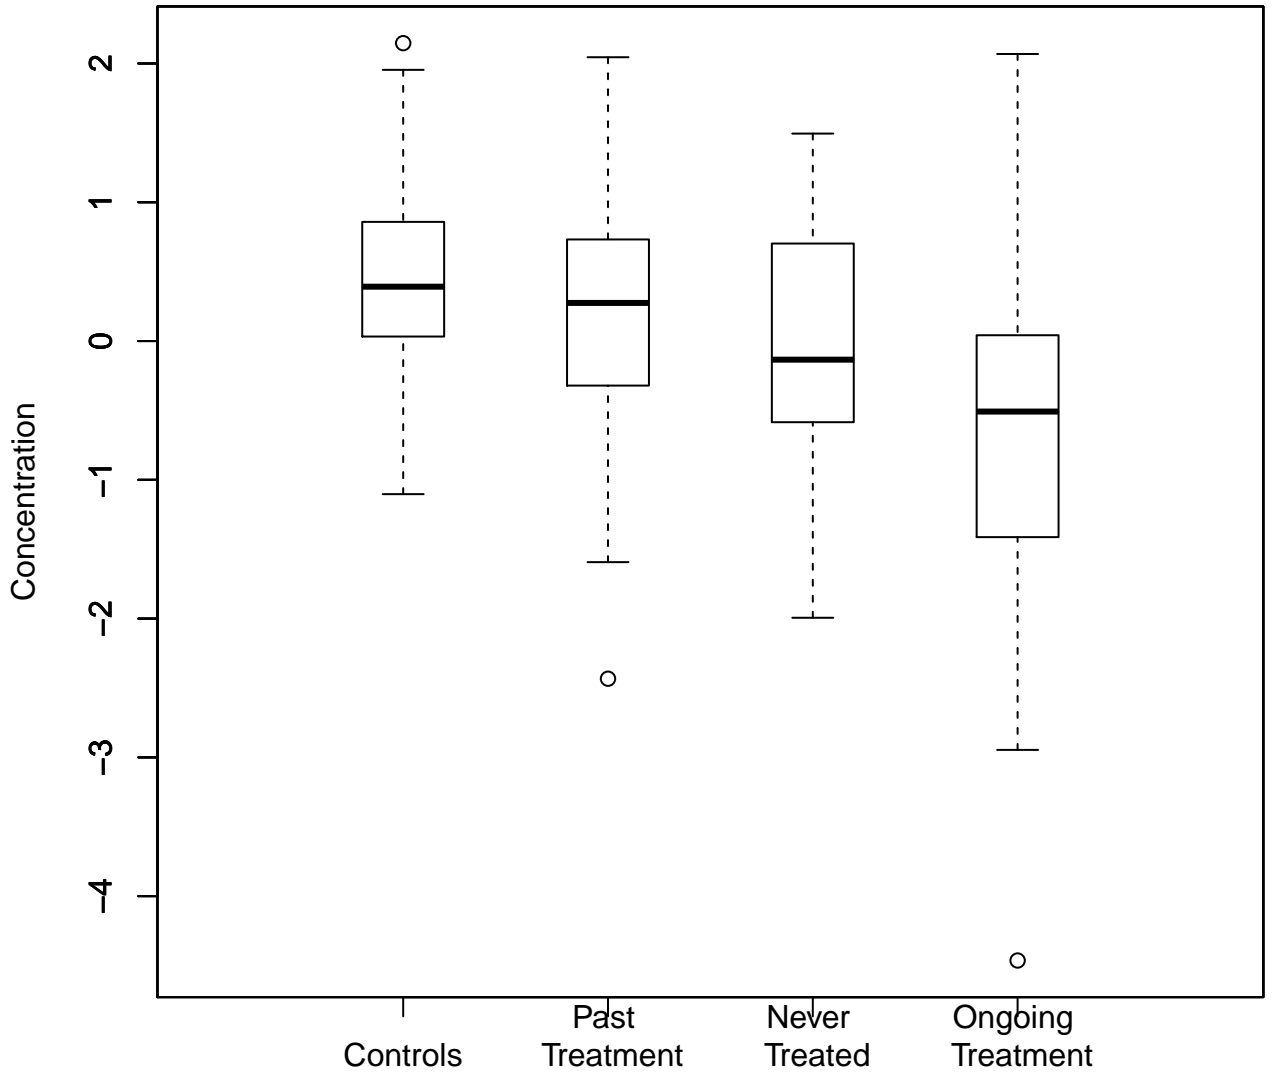

# 4-androsten-3beta,17beta-diol disulfate (1)

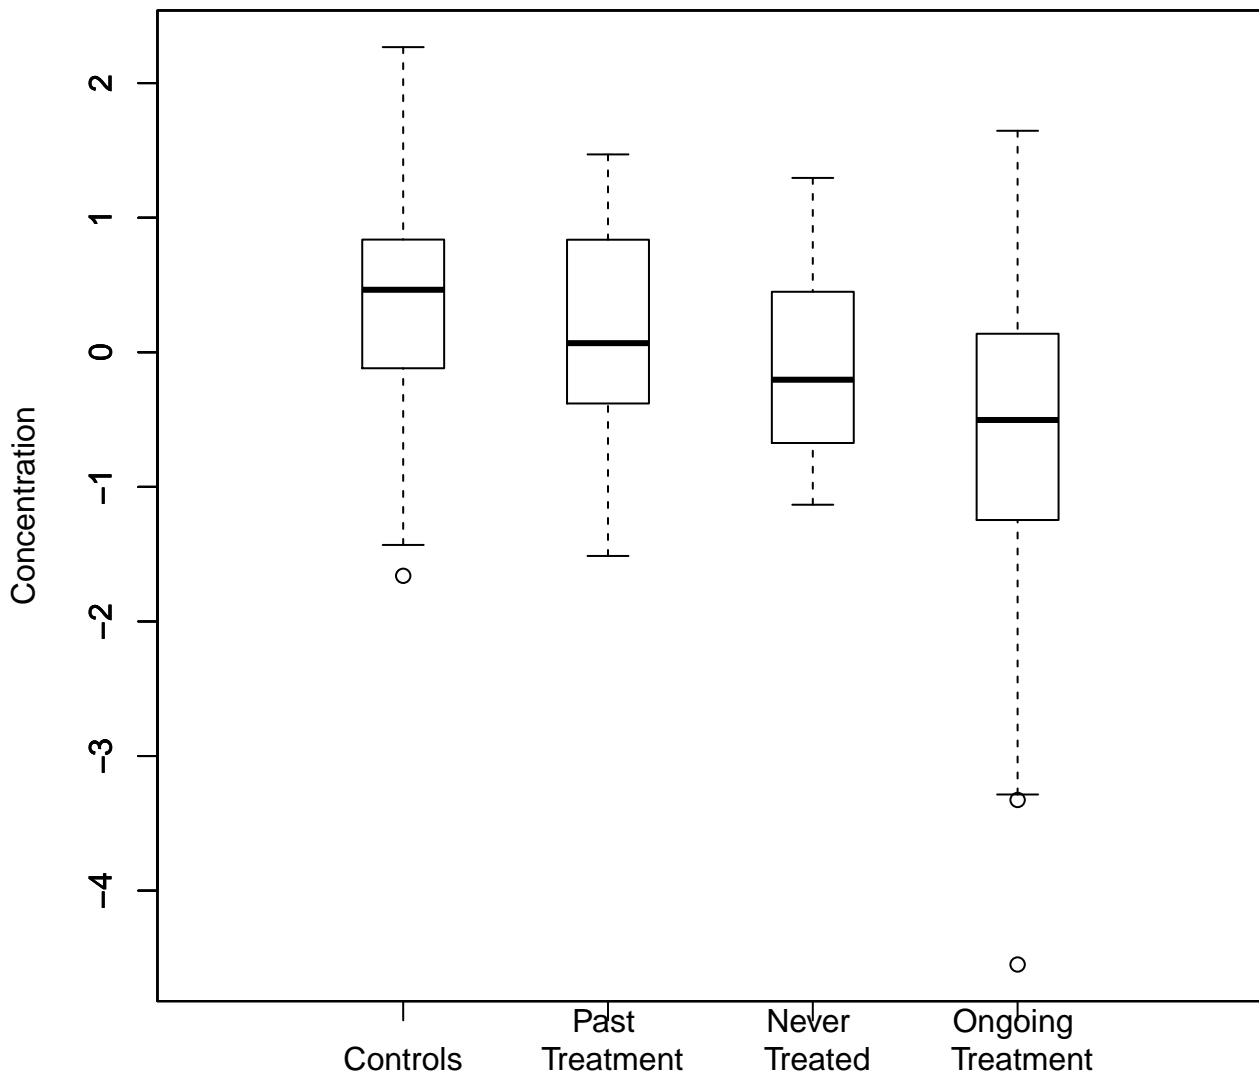

# X - 21470

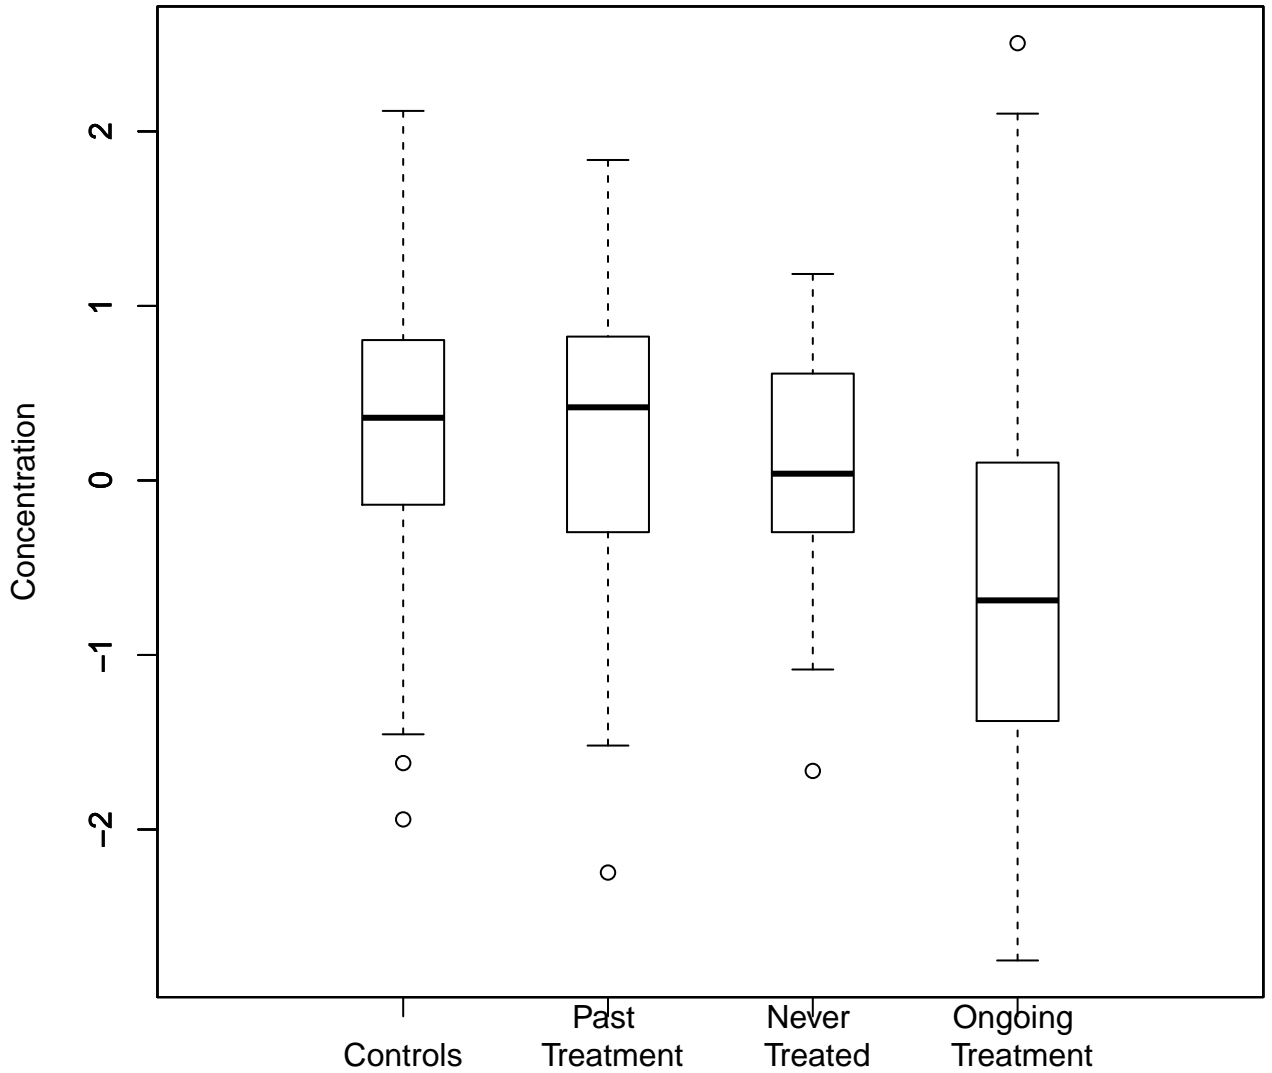

# X - 21410

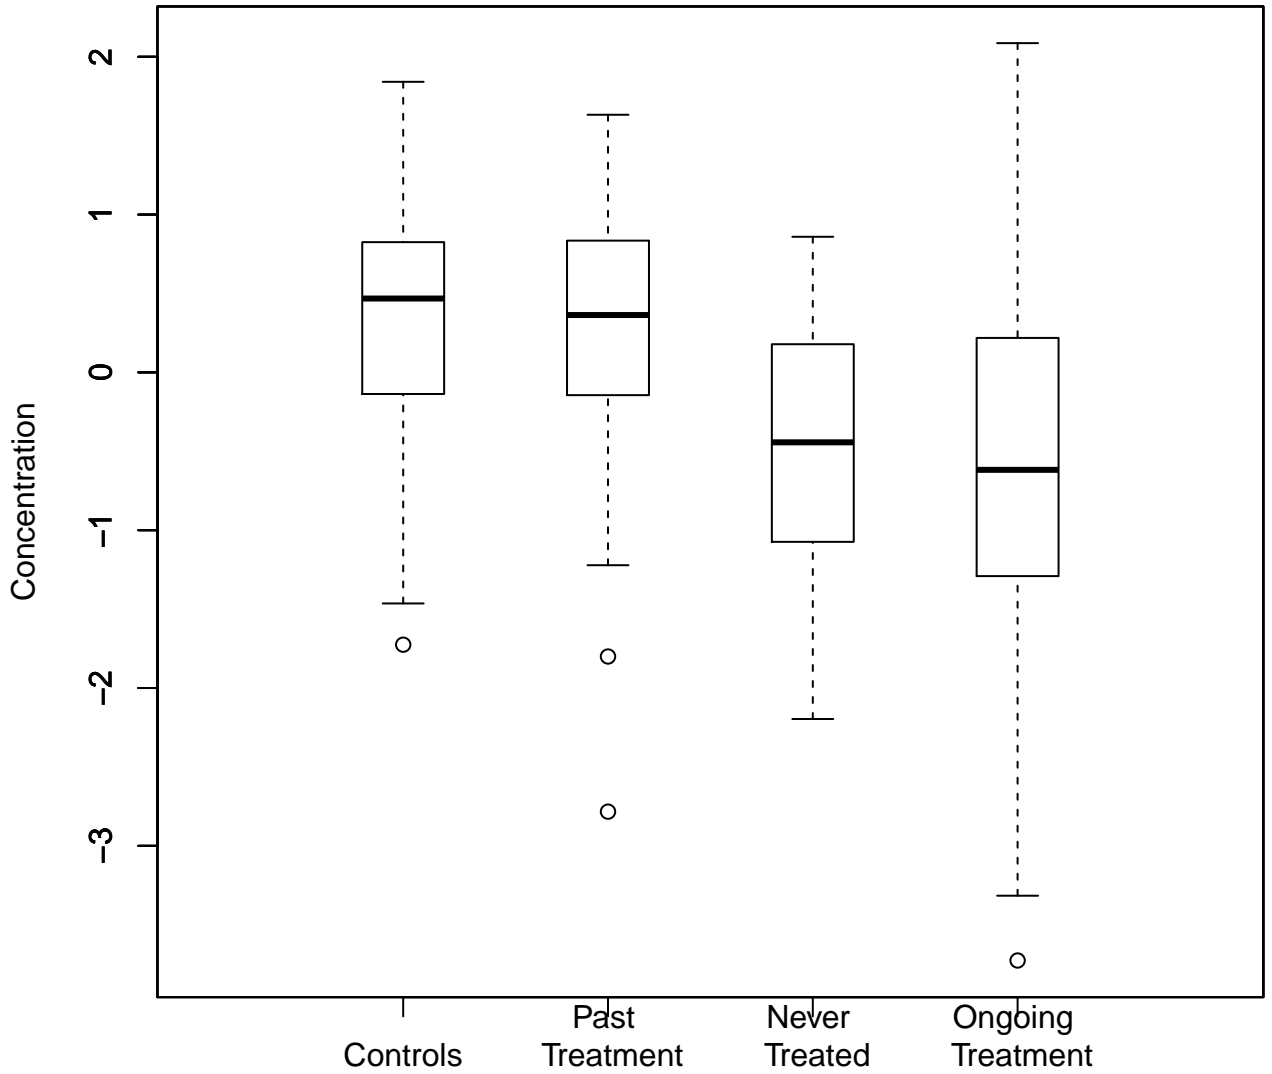

# sarcosine (N-Methylglycine)

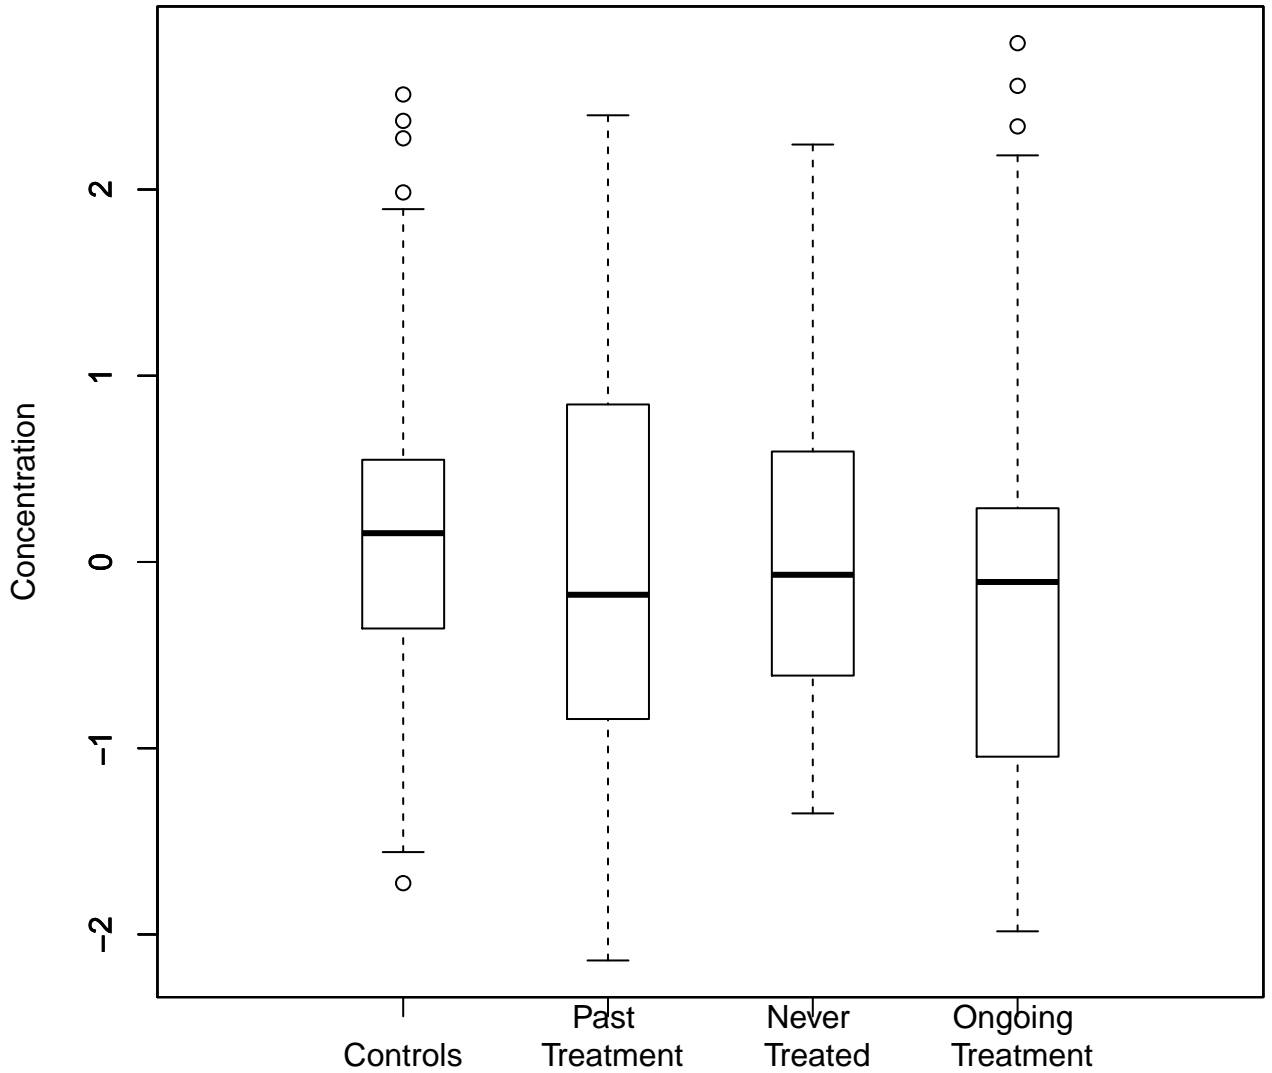

# X - 18779

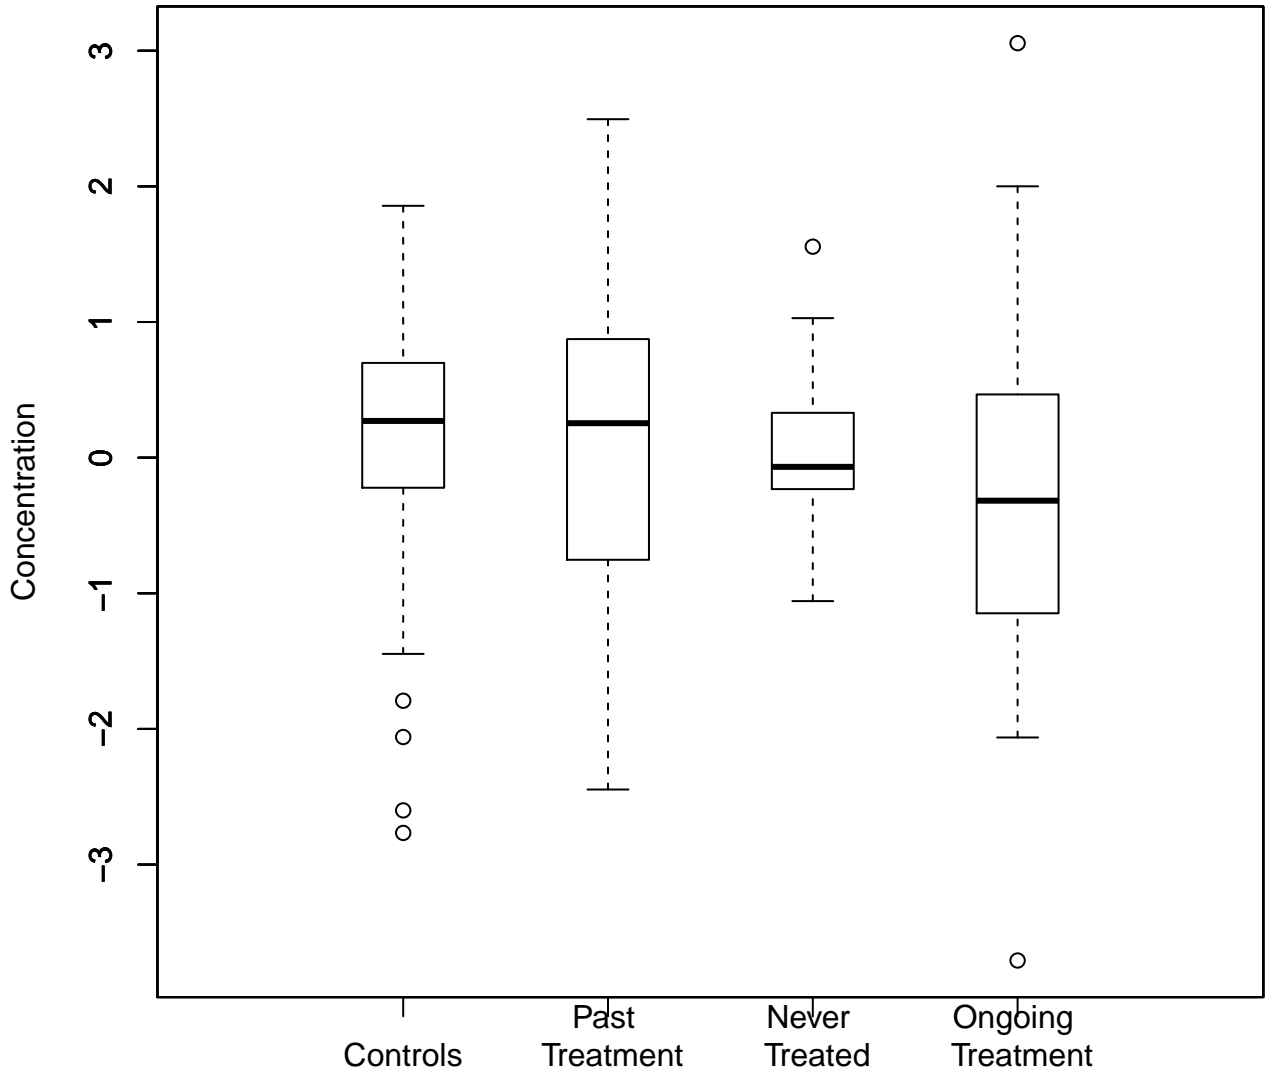

# 4-methyl-2-oxopentanoate

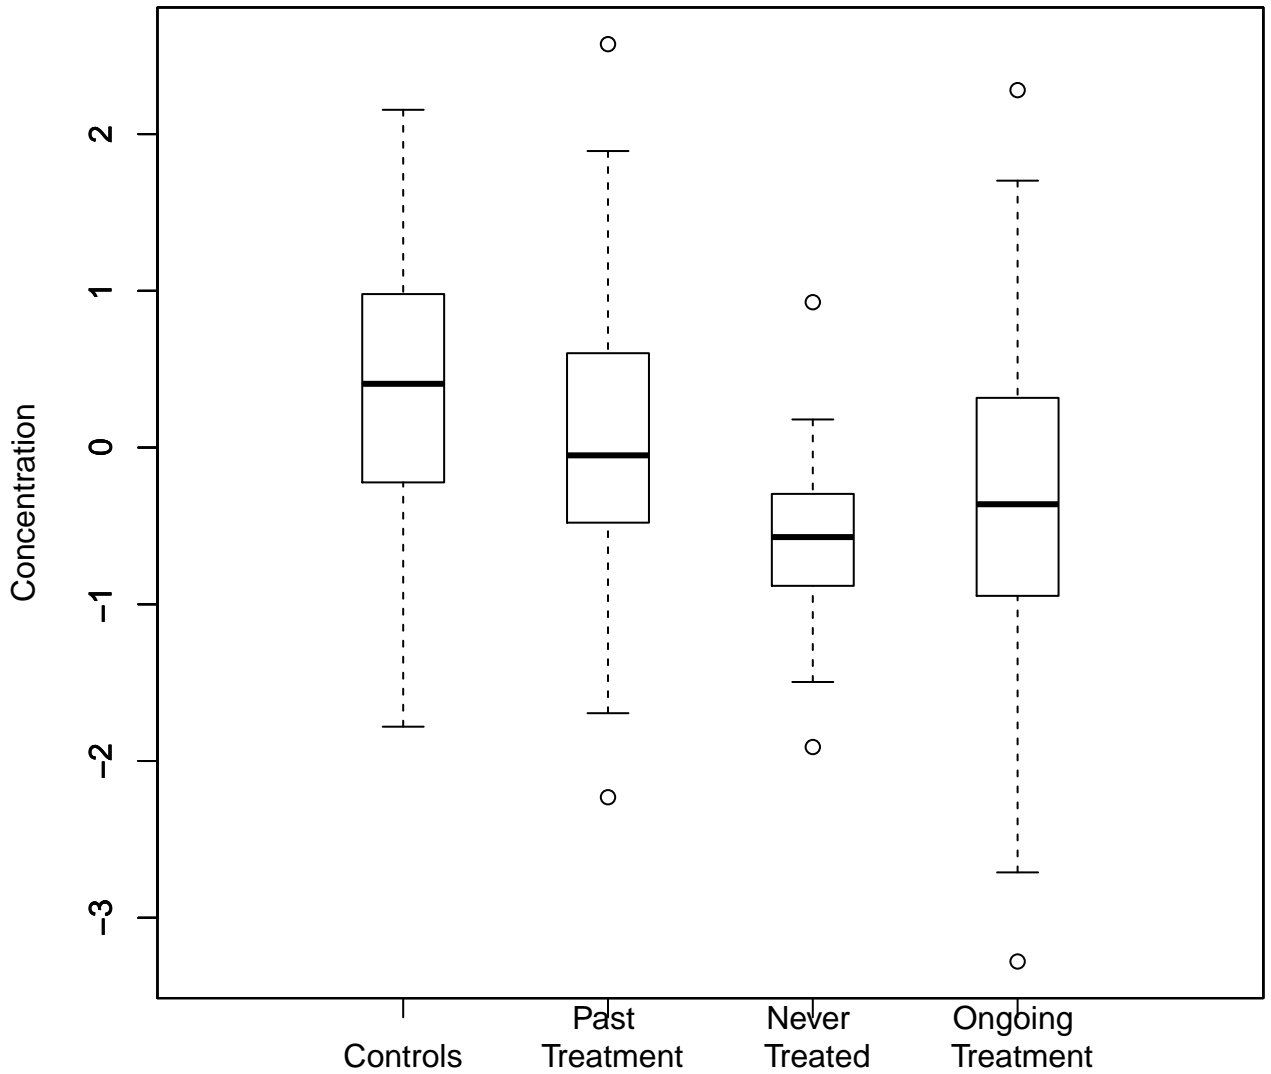



# X - 17359

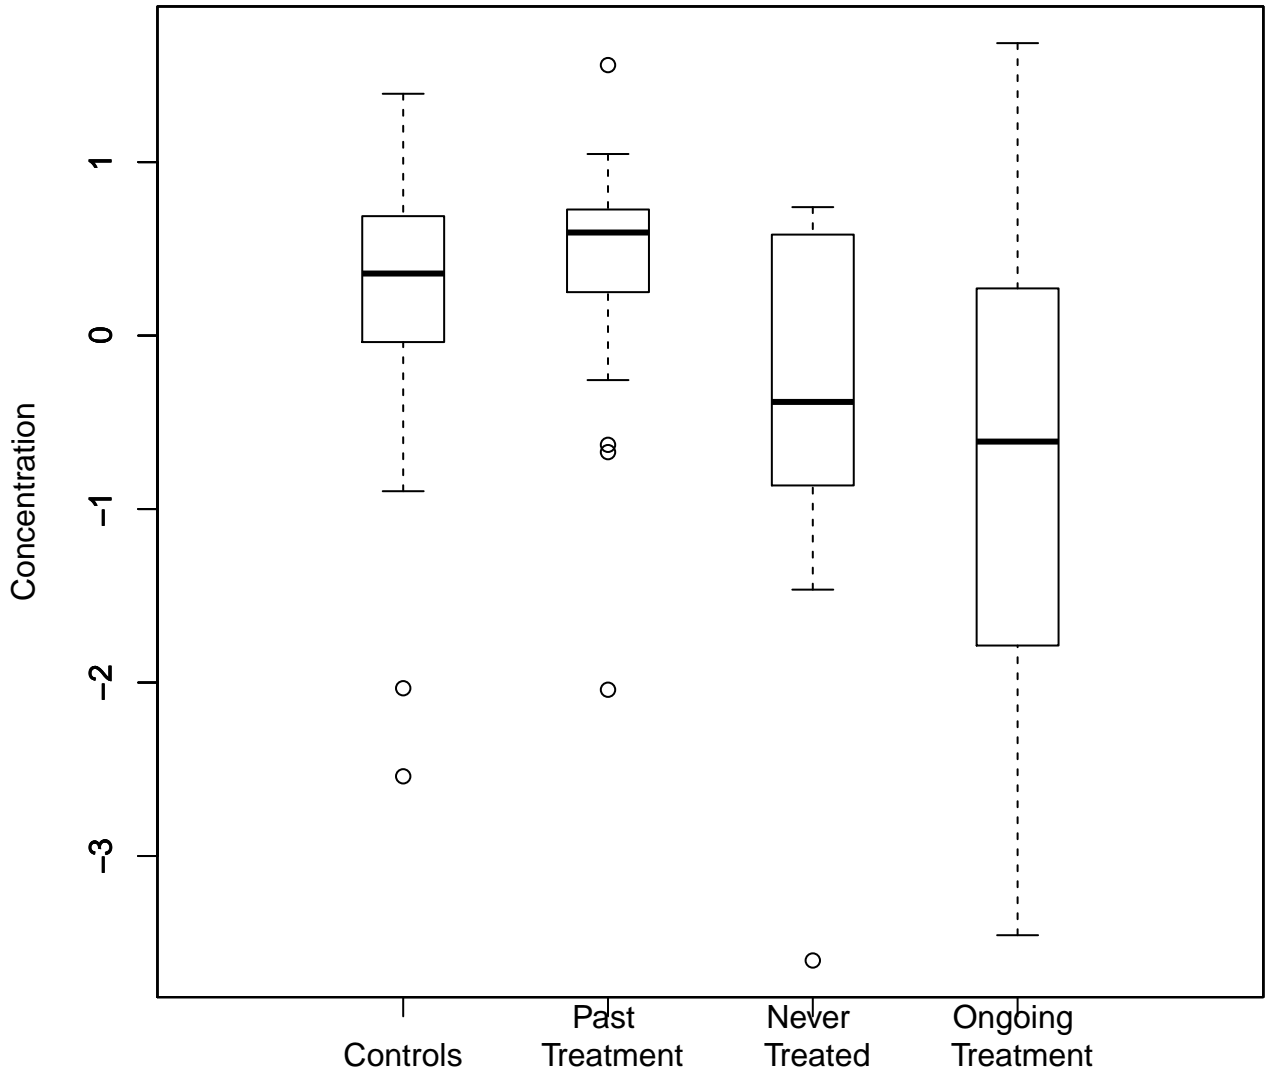

**pregnen-diol disulfate\***

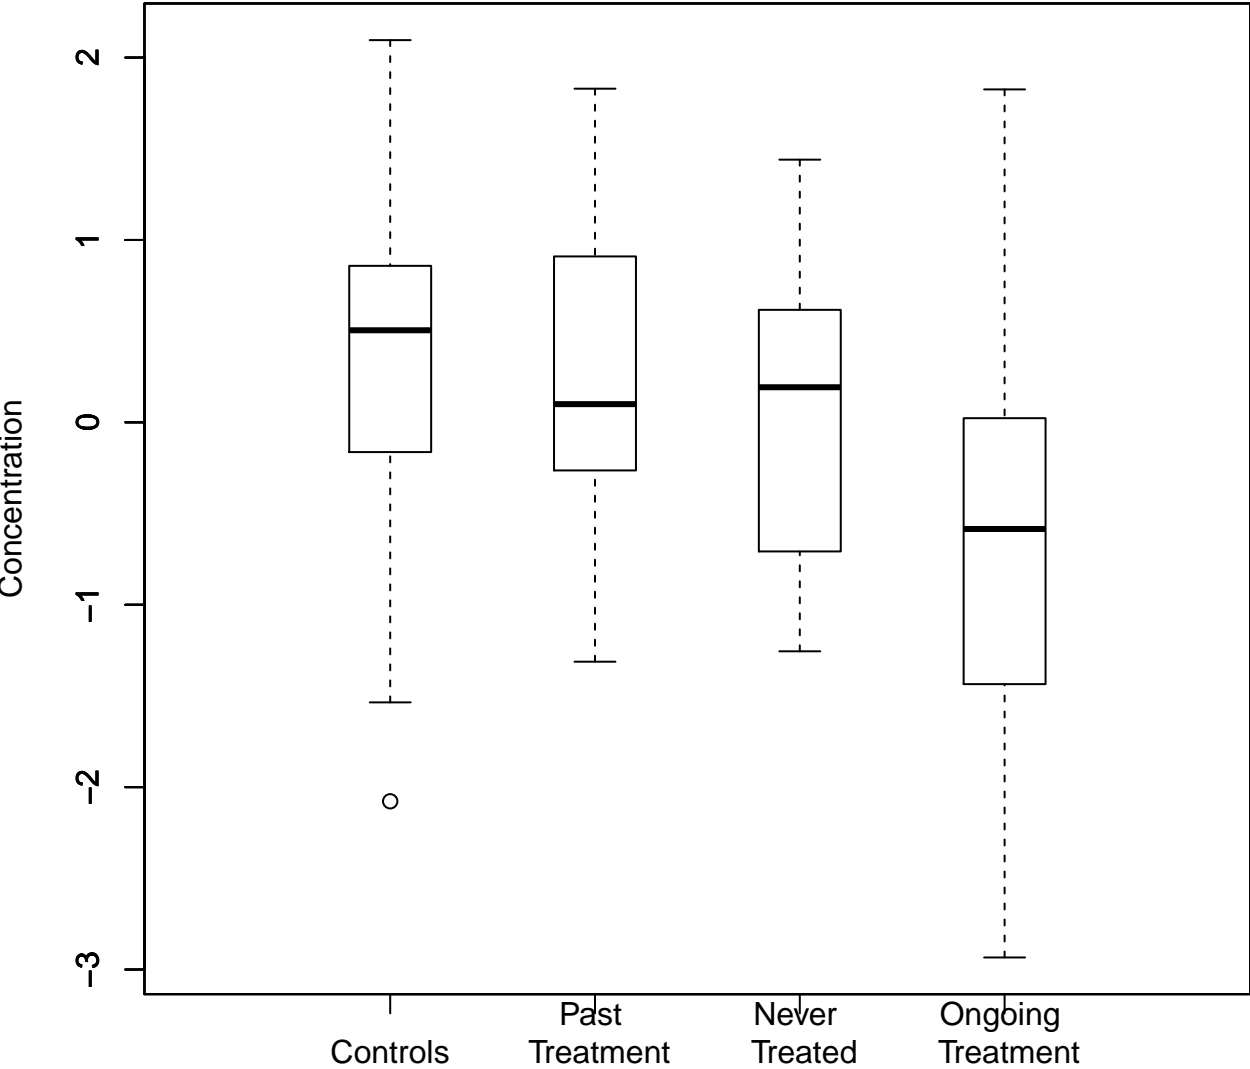

# cortisol

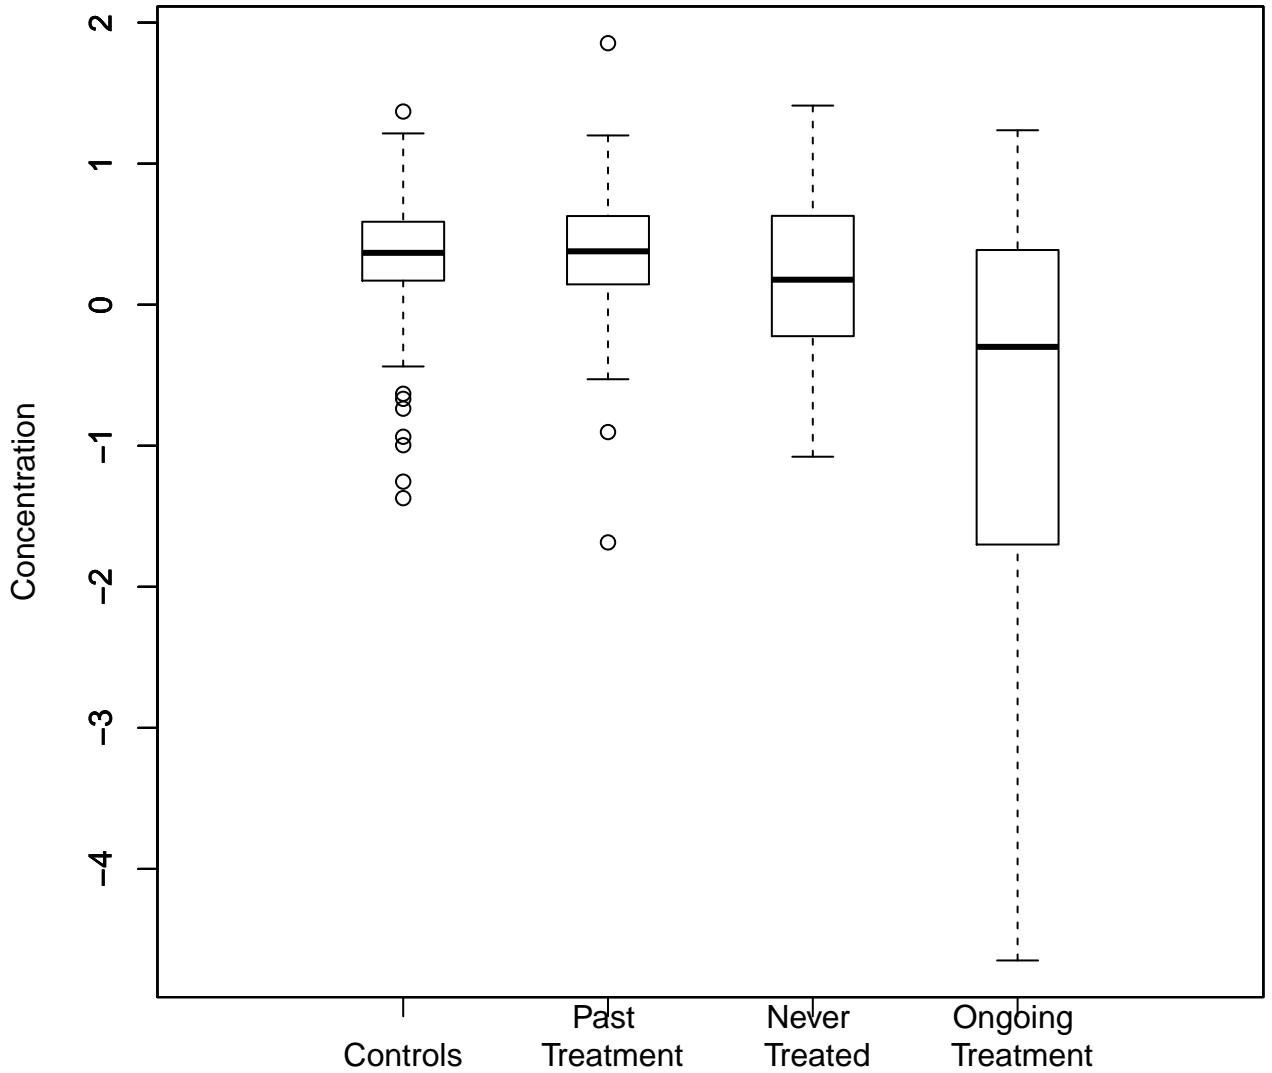

# X - 17340

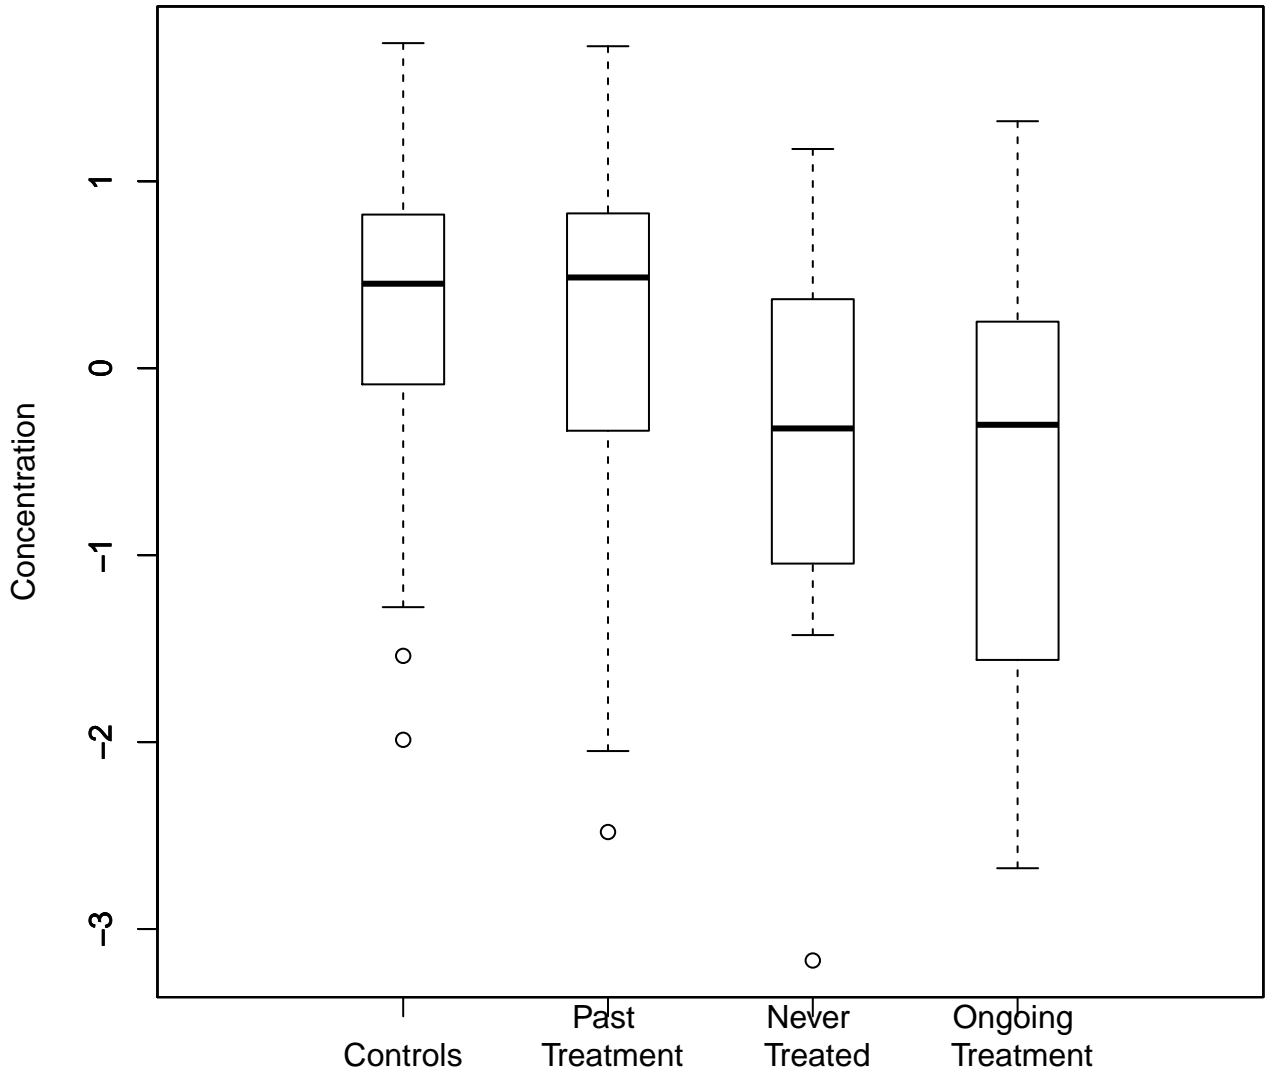

# 16 $\alpha$ -hydroxy DHEA 3-sulfate

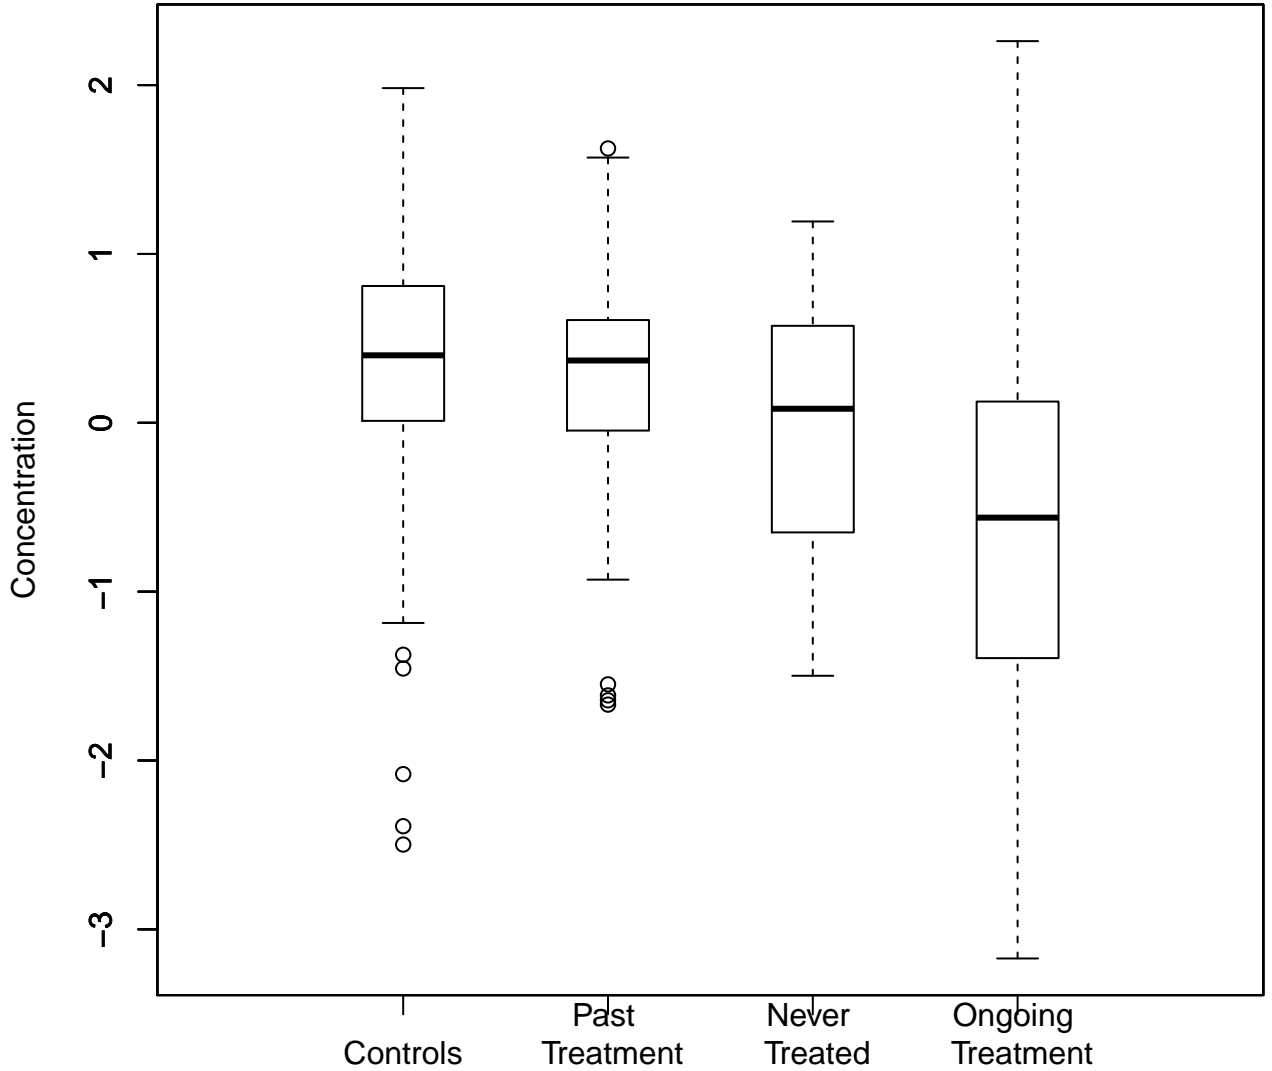

# cortisone

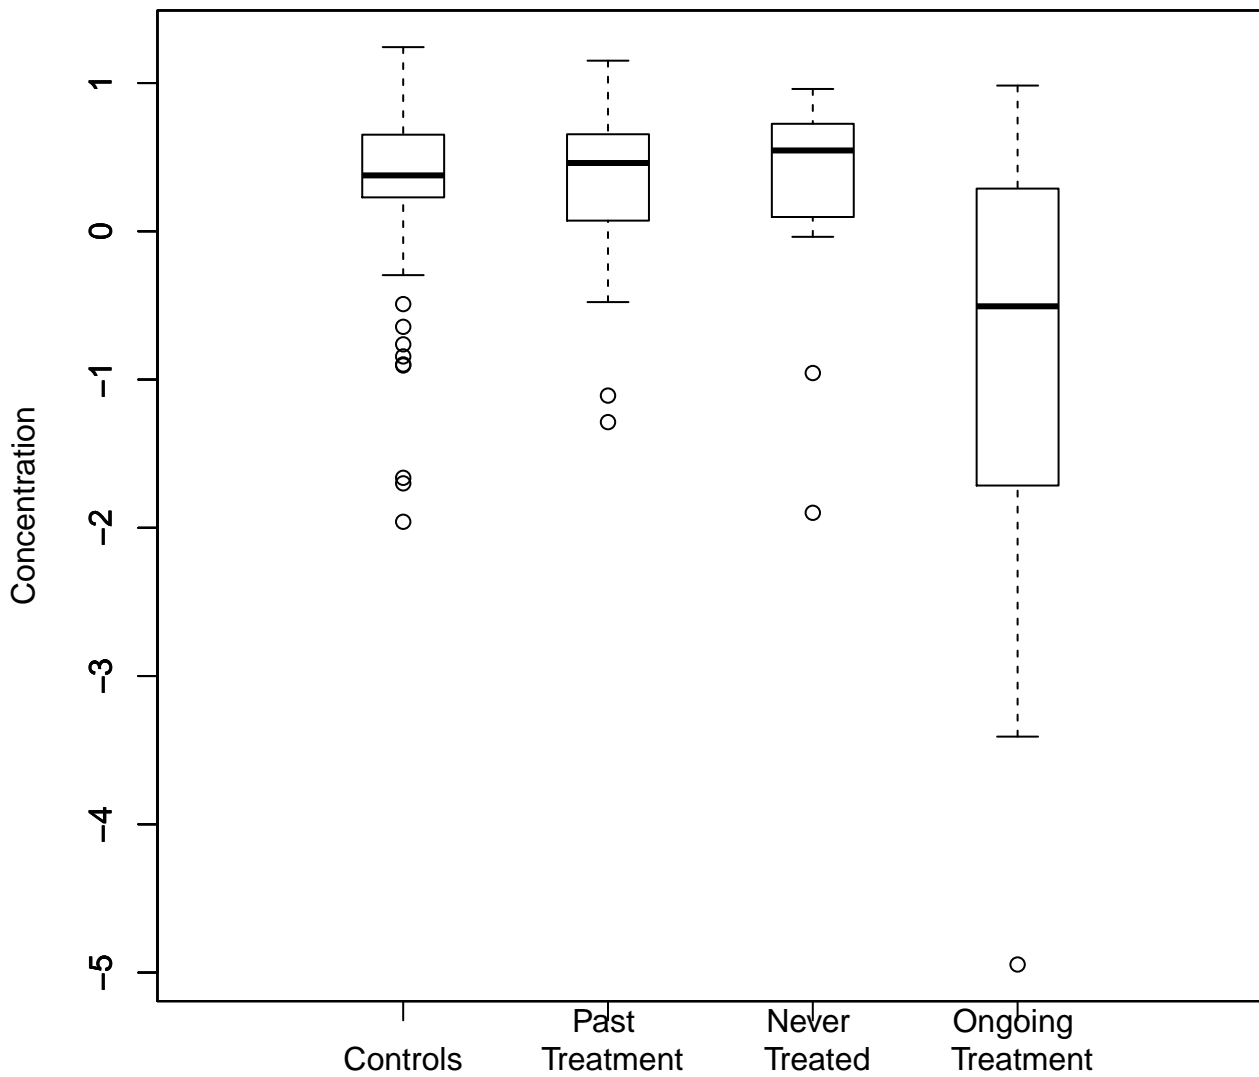

# 3-methyl-2-oxovalerate

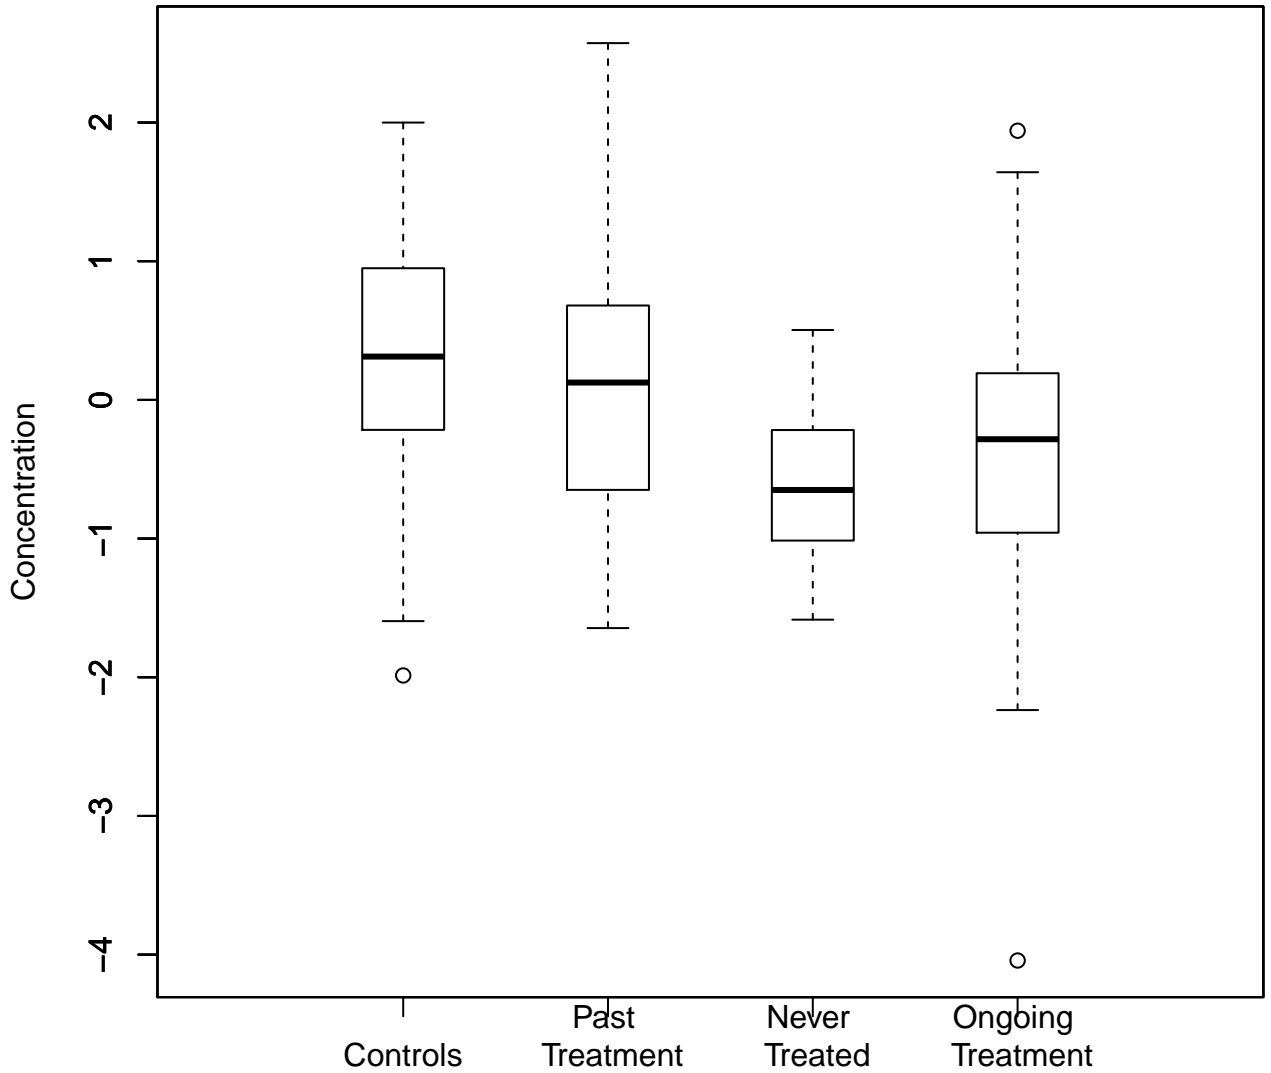

# prolylglycine

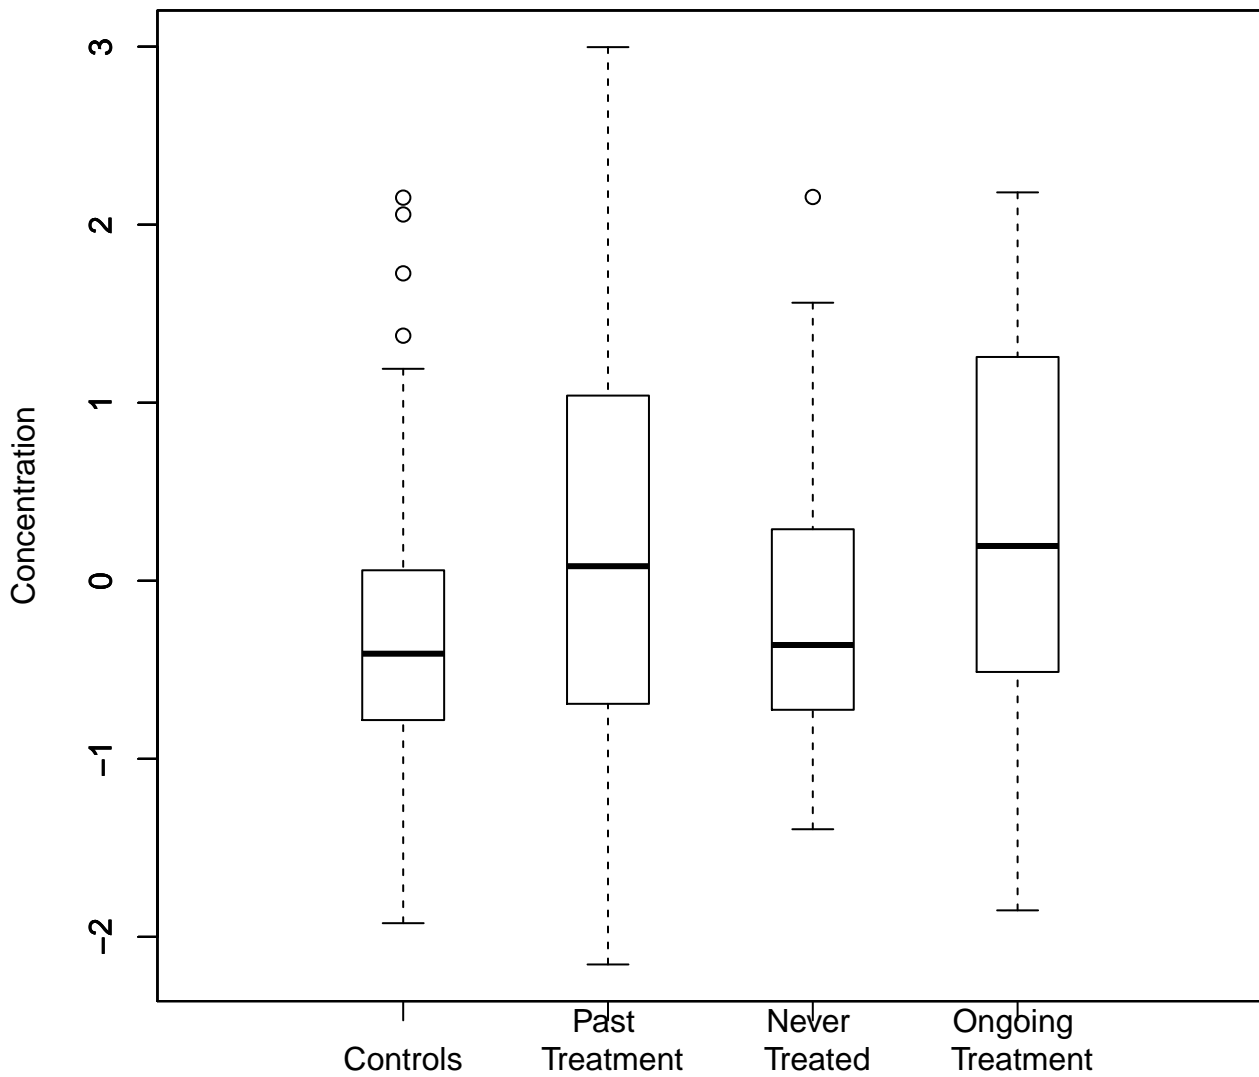



# etiocholanolone glucuronide

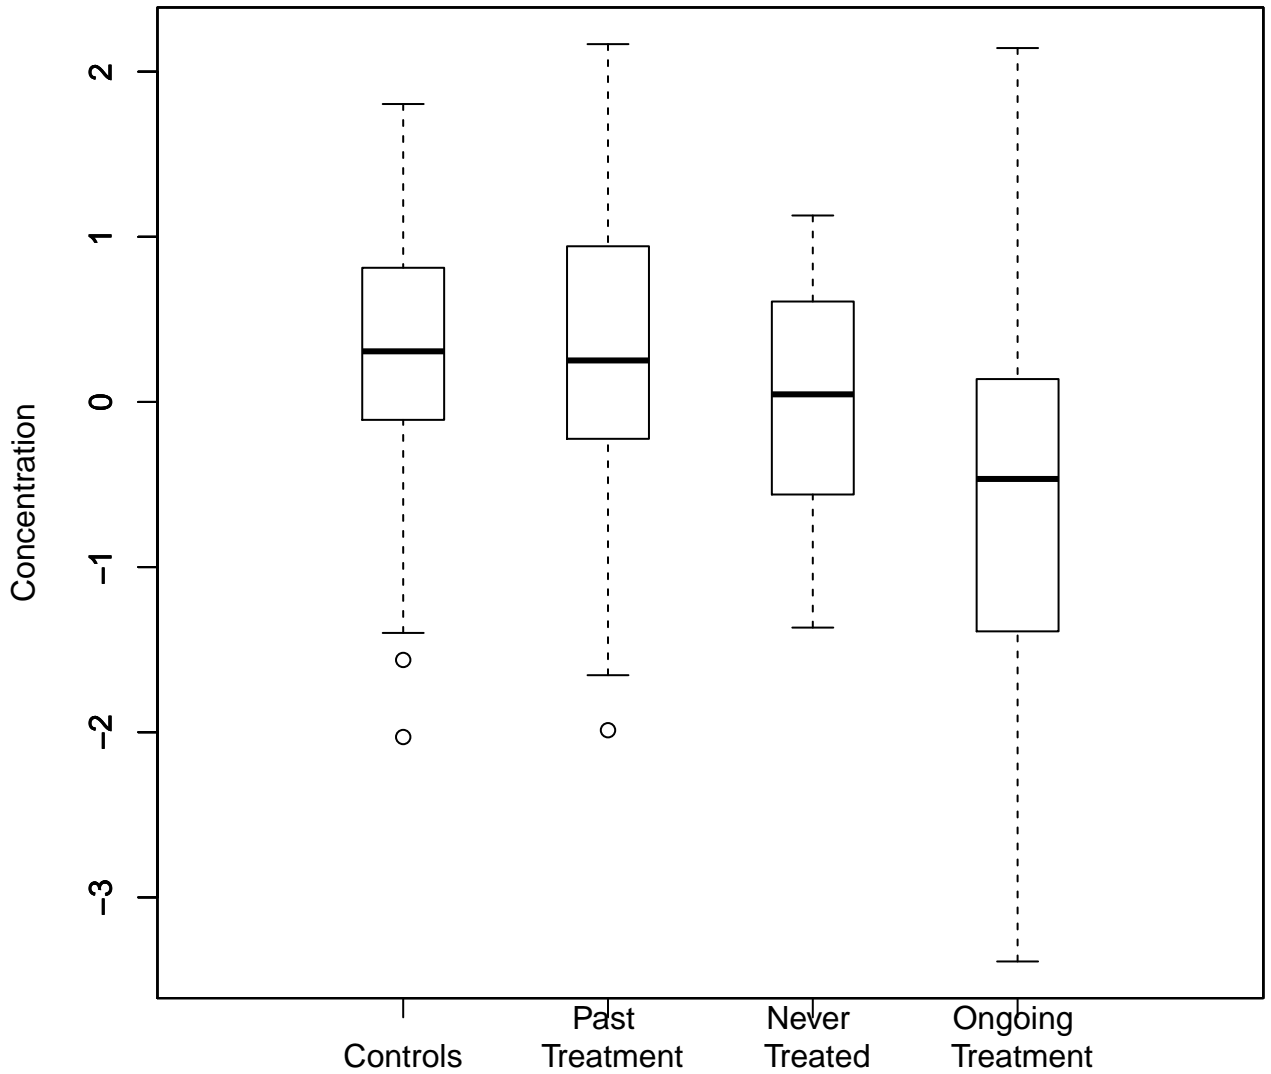

# X - 21441

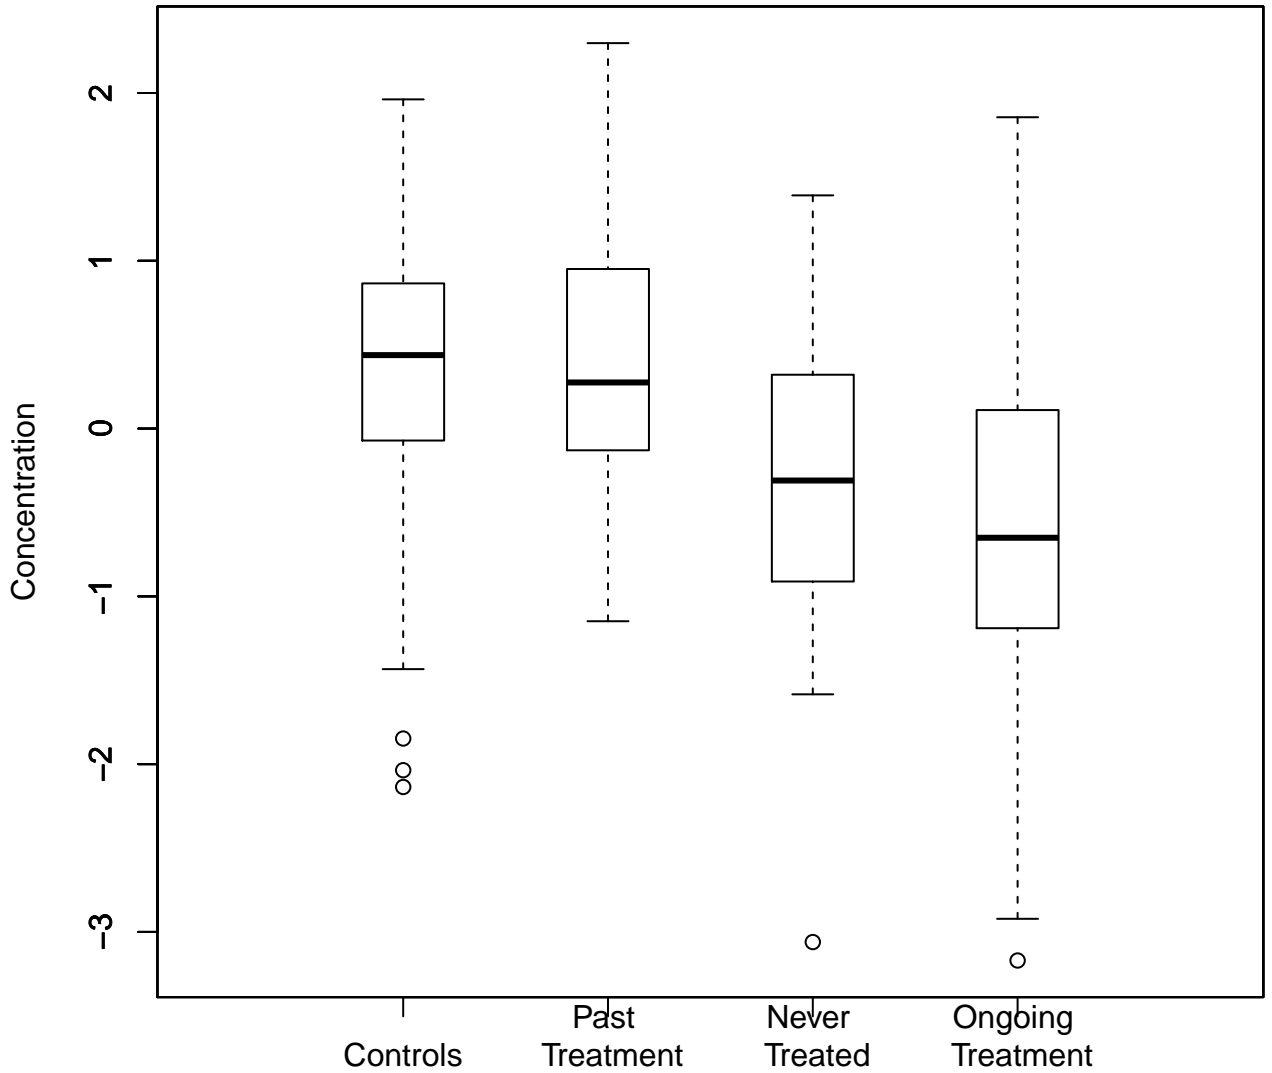

# 21-hydroxypregnenolone disulfate

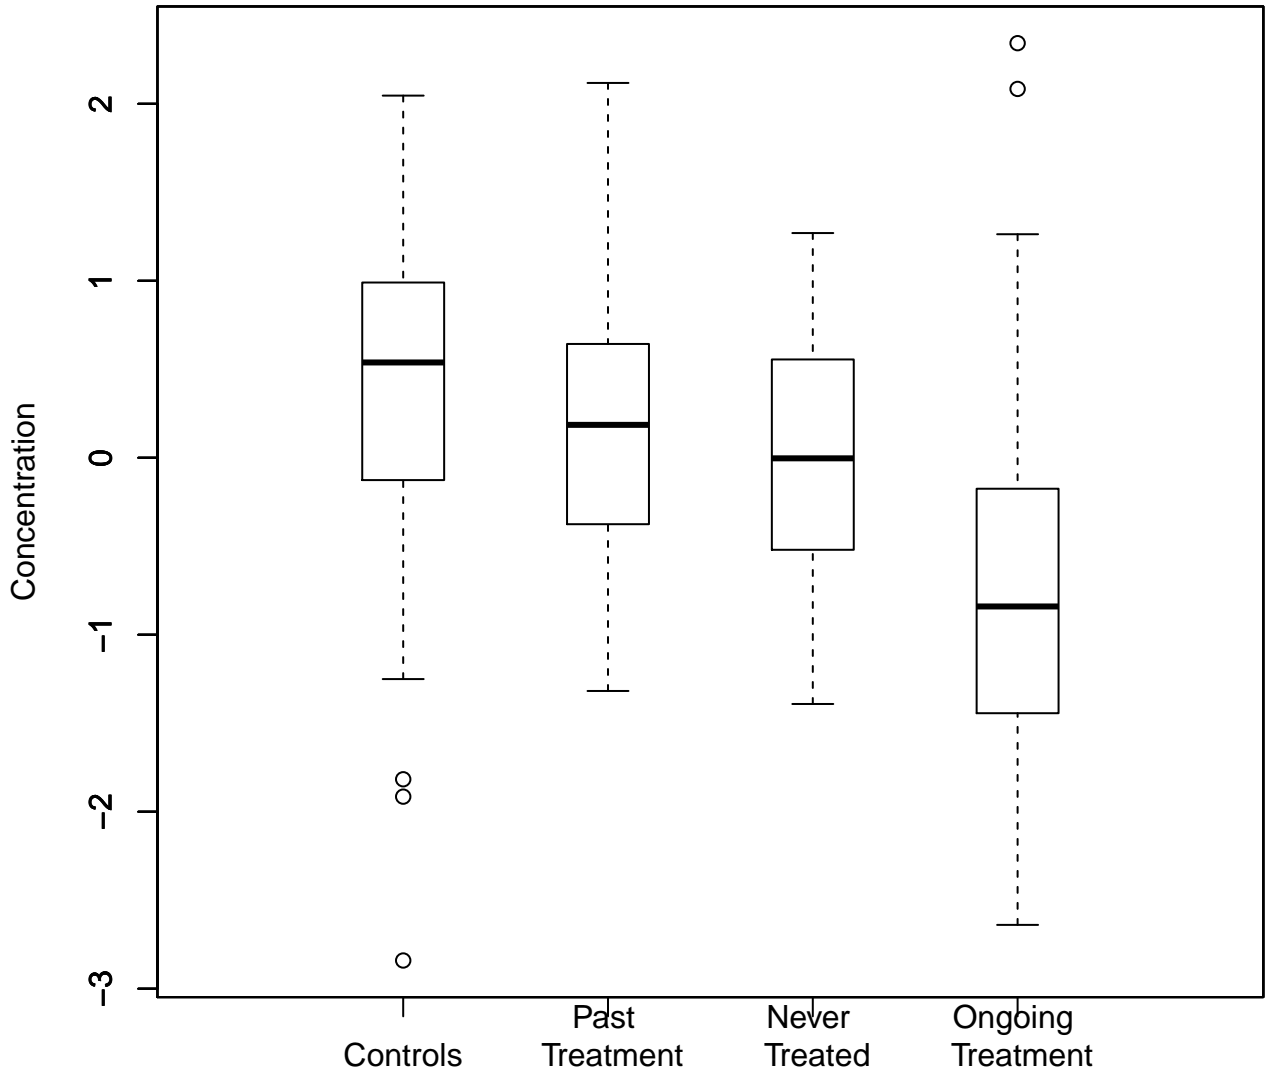

# 4-androsten-3alpha,17alpha-diol monosulfate (2)

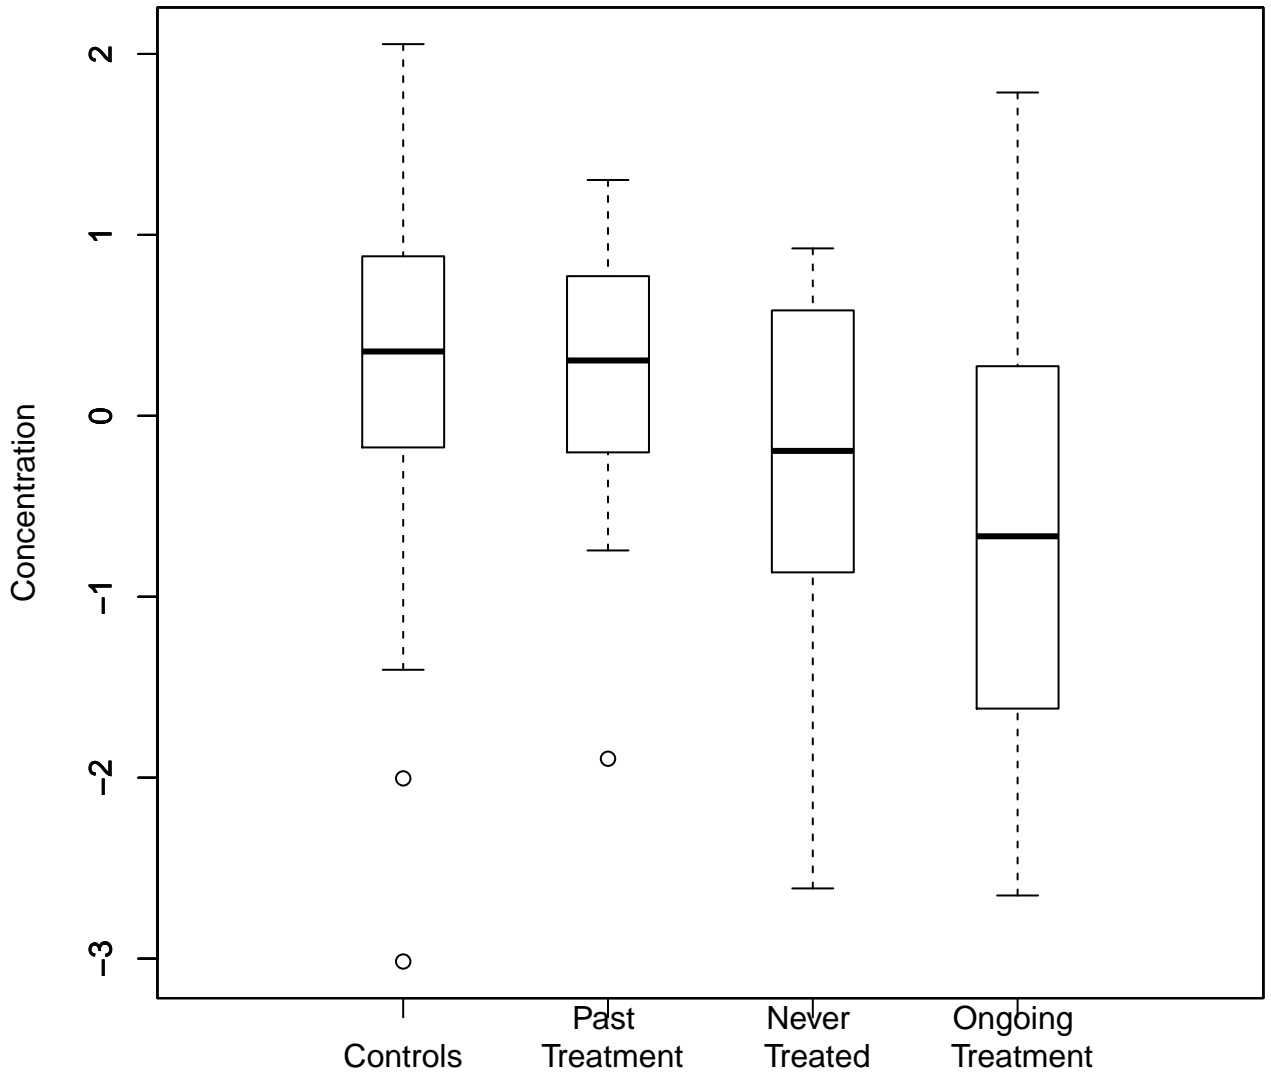

# pregnenolone sulfate

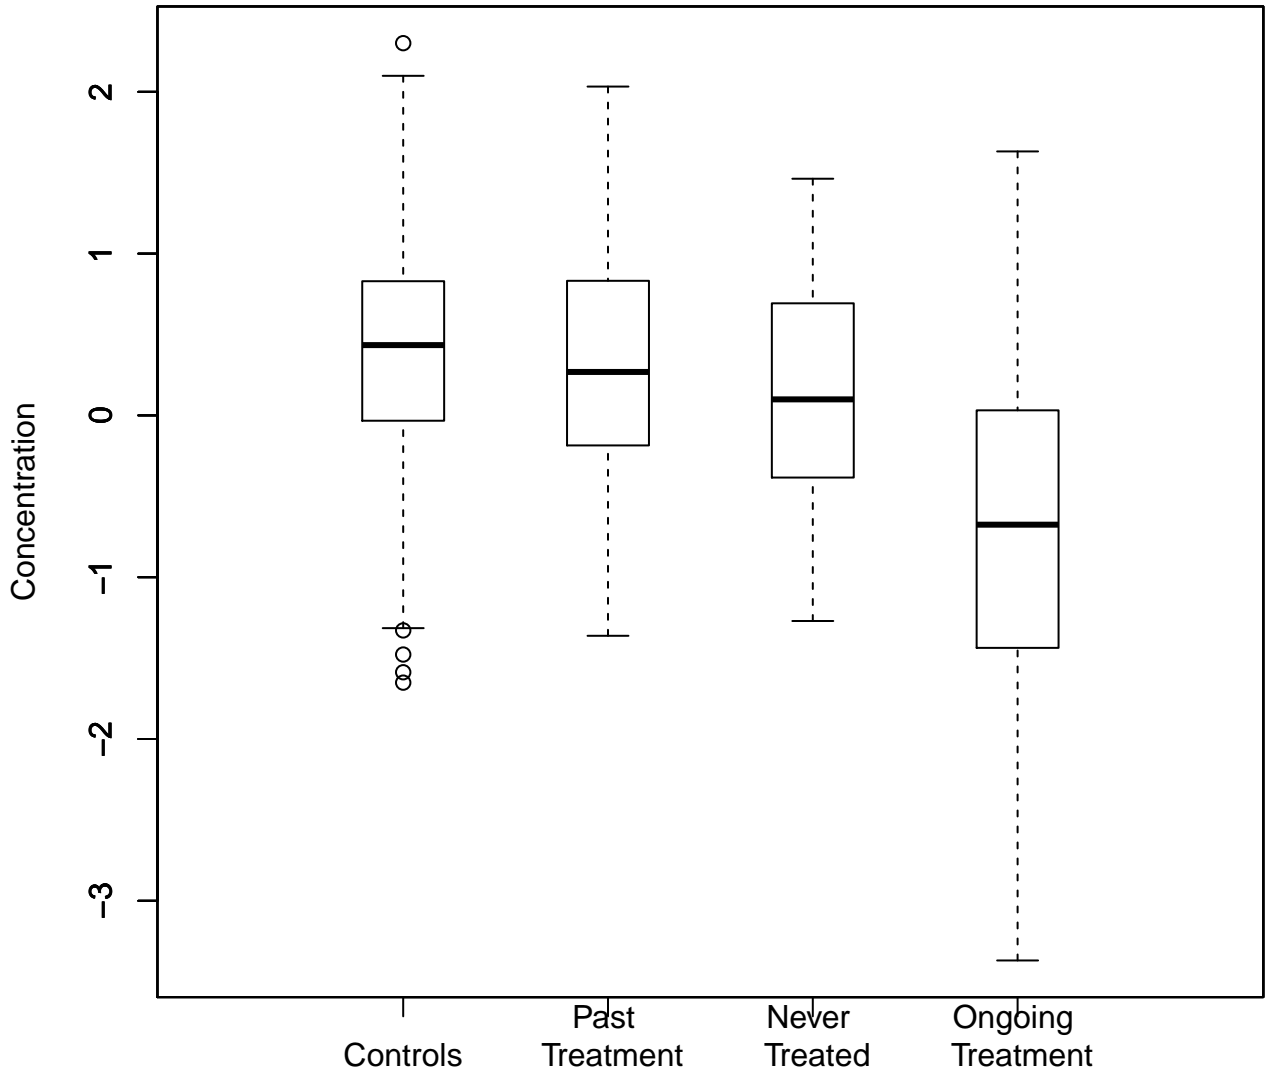

Supplement: 41598_2017_5439_MOESM1_ESM.pdf [file 41598_2017_5439_MOESM1_ESM.pdf]
